# Supplementary material
Source: publisher site journal article supplement (https://www.spandidos-publications.com/4985/downloadSupplementary)
Supplement: Supplementary file 2 [file downloadSupplementary]

## Sheet: Table SII
Table SII. Significantly regulated mRNAs in the intra-group comparison.
TIVA-group						VAG-group
mRNA	baseMean	log2FC	padj			mRNA	baseMean	log2FC	padj
ABCA5	141.5	-0.72	5.98 × 10	-2		ABCA5	70.53	-0.52	4.82 × 10	-2
ABCC5	342.4	-0.72	1.48 × 10	-2		ABCC5	152.08	-0.64	2.83 × 10	-2
ABHD13	190.83	-1.23	1.26 × 10	-3		ABHD13	97.93	-0.73	9.04 × 10	-3
ABHD5	733.73	-0.68	4.45 × 10	-2		ABHD5	356.57	-0.6	3.09 × 10	-2
ACAP1	605.7	-0.87	7.75 × 10	-3		ACAP1	281.84	-0.9	8.13 × 10	-3
ACSL1	8408.59	-1.65	1.48 × 10	-4		ACSL1	3950.73	-1.57	1.41 × 10	-5
ACSL3	218.48	-1.01	1.41 × 10	-2		ACSL3	112.4	-1.27	7.84 × 10	-3
ACSL4	820.12	-1.31	2.48 × 10	-3		ACSL4	393.66	-1.09	5.03 × 10	-3
ACVR1B	203.2	-1.34	2.01 × 10	-3		ACVR1B	94.25	-1.16	5.33 × 10	-3
ADAM19	980.68	-1.05	8.54 × 10	-4		ADAM19	477.11	-0.85	2.02 × 10	-3
ADM	271.76	-1.07	4.04 × 10	-3		ADM	130.74	-0.89	4.99 × 10	-2
AGAP2	298.87	-0.77	4.79 × 10	-3		AGAP2	149.95	-0.6	5.04 × 10	-2
AGFG1	933.39	-1.59	1.48 × 10	-4		AGFG1	446.62	-1.52	6.20 × 10	-5
AGPAT6	193.42	-0.71	9.59 × 10	-2		AGPAT6	98.37	-0.72	7.56 × 10	-2
AGTPBP1	1186.21	-1.17	8.17 × 10	-5		AGTPBP1	561.94	-0.63	2.59 × 10	-2
AHNAK	4920.16	0.71	1.85 × 10	-2		AHNAK	2096.14	0.83	8.22 × 10	-2
ALOX5	1802.92	-1.1	4.18 × 10	-3		ALOX5	803.73	-0.97	2.30 × 10	-2
ALOX5AP	1502.62	-1.65	2.84 × 10	-5		ALOX5AP	860.73	-1.64	2.03 × 10	-6
ALPL	1275.61	-0.76	5.63 × 10	-2		ALPL	661.04	-0.79	5.13 × 10	-2
AMPD2	408.81	0.58	5.02 × 10	-2		AMPD2	197.43	1.08	3.03 × 10	-2
ANKRD22	155.98	-2.83	5.12 × 10	-4		ANKRD22	56.68	-2.11	4.18 × 10	-4
ANKRD50	100.58	-0.59	2.40 × 10	-2		ANKRD50	59.62	-0.55	4.03 × 10	-2
ANO10	119.13	-0.86	8.38 × 10	-3		ANO10	67.2	-0.96	1.20 × 10	-3
ANXA3	519.12	-2.31	1.05 × 10	-5		ANXA3	273.53	-1.7	3.16 × 10	-4
APMAP	1027.16	-1.43	2.12 × 10	-5		APMAP	474.84	-1.23	1.02 × 10	-4
APOL3	191.47	0.71	9.49 × 10	-2		APOL3	76.99	1.39	4.21 × 10	-3
AQP9	3952.37	-0.98	3.63 × 10	-3		AQP9	1894.16	-0.86	4.49 × 10	-2
ARAP2	680.34	-0.79	6.07 × 10	-3		ARAP2	306.63	-0.69	2.31 × 10	-2
ARG1	205.03	-2.67	1.59 × 10	-5		ARG1	70.71	-2.69	3.77 × 10	-6
ARHGAP24	178.59	-1.42	6.47 × 10	-4		ARHGAP24	82.76	-0.77	5.05 × 10	-2
ARID3A	395.13	-0.76	1.42 × 10	-2		ARID3A	181.04	-0.59	9.74 × 10	-3
ARID5A	336.68	-1.54	1.79 × 10	-3		ARID5A	185.32	-1.63	5.17 × 10	-5
ARL8A	256.58	-0.66	9.06 × 10	-3		ARL8A	121.25	-0.61	9.98 × 10	-2
ARRB1	497.85	0.51	5.77 × 10	-2		ARRB1	236.51	0.8	6.23 × 10	-3
ASPH	673.13	-1.34	1.36 × 10	-2		ASPH	364.13	-1.52	1.34 × 10	-5
ATP11A	1226.26	-0.74	3.22 × 10	-3		ATP11A	572.63	-0.6	6.91 × 10	-2
ATP11B	1251.98	-1.48	1.56 × 10	-6		ATP11B	647.57	-1.16	6.79 × 10	-3
ATP13A3	277.43	-0.69	2.58 × 10	-2		ATP13A3	167.75	-0.77	2.45 × 10	-2
ATP6V1C1	299.32	-1.34	1.83 × 10	-4		ATP6V1C1	178.05	-0.98	8.93 × 10	-3
ATP8B2	209.54	0.72	3.59 × 10	-2		ATP8B2	102.54	0.8	2.54 × 10	-3
ATP9A	181.68	-1.59	1.61 × 10	-2		ATP9A	87.1	-2.47	2.03 × 10	-6
AUTS2	94.65	0.7	5.30 × 10	-2		AUTS2	101.9	-0.85	6.26 × 10	-2
AZI2	135.64	-1.13	2.29 × 10	-4		AZI2	76.46	-0.9	6.43 × 10	-3
AZIN1	465.91	-0.88	1.19 × 10	-3		AZIN1	223.24	-0.57	3.29 × 10	-2
B3GNT2	109.19	-0.7	1.78 × 10	-2		B3GNT2	58.77	-0.68	3.43 × 10	-2
B3GNT5	167.81	-1.08	3.13 × 10	-2		B3GNT5	102.13	-1.25	1.46 × 10	-2
B4GALT5	1142.72	-0.97	1.01 × 10	-2		B4GALT5	610.36	-1.18	3.08 × 10	-3
BACH2	141.24	1.06	3.22 × 10	-2		BACH2	76.11	0.97	6.85 × 10	-2
BASP1	1954.86	-1.04	2.28 × 10	-3		BASP1	930.12	-1.06	8.39 × 10	-3
BAZ1A	1270.87	-0.97	1.53 × 10	-3		BAZ1A	699.62	-0.83	1.06 × 10	-2
BCL11B	334.05	0.77	8.52 × 10	-2		BCL11B	175.06	0.8	7.41 × 10	-2
BCL2	241.06	0.71	9.39 × 10	-2		BCL2	136.61	1.15	1.10 × 10	-6
BCL2A1	268.28	-2.34	1.71 × 10	-6		BCL2A1	152.99	-1.79	2.70 × 10	-4
BCL3	615.94	-1.29	2.37 × 10	-3		BCL3	279.99	-1.41	4.55 × 10	-4
BCL6	5017.41	-0.91	2.03 × 10	-2		BCL6	2512.67	-0.65	3.02 × 10	-2
BCL9L	249.43	0.8	5.85 × 10	-2		BCL9L	107.52	0.77	7.15 × 10	-2
BEST1	757.49	-0.71	3.30 × 10	-2		BEST1	377.61	-0.59	7.12 × 10	-2
BHLHE40	180.29	0.54	9.98 × 10	-2		BHLHE40	91.49	1.23	1.05 × 10	-4
BMX	121.46	-2.37	4.09 × 10	-7		BMX	66.15	-2.56	1.05 × 10	-9
BNIP2	543.85	-1.17	1.79 × 10	-5		BNIP2	284.37	-0.86	2.49 × 10	-2
BPI	88.01	-1.29	4.22 × 10	-6		BPI	54.92	-1.36	5.01 × 10	-3
BRI3BP	93.21	0.66	8.96 × 10	-2		BRI3BP	57.43	0.73	3.72 × 10	-2
BST1	478.53	-1.15	5.38 × 10	-4		BST1	240.81	-0.7	2.23 × 10	-2
BTN3A2	488.21	0.78	3.27 × 10	-3		BTN3A2	261.08	0.76	4.19 × 10	-2
BTN3A3	257.77	0.84	1.40 × 10	-2		BTN3A3	125.79	1.31	5.51 × 10	-3
BTNL8	220.92	-0.86	1.36 × 10	-2		BTNL8	98.57	-0.58	9.13 × 10	-2
C17orf62	1190.4	-0.85	1.41 × 10	-2		C17orf62	564.62	-0.57	9.02 × 10	-2
C19orf35	201.32	-0.94	2.18 × 10	-2		C19orf35	107.5	-1.02	5.34 × 10	-3
C19orf38	267.52	-0.94	4.54 × 10	-4		C19orf38	124.41	-0.68	7.20 × 10	-2
C1RL	511.71	-0.6	4.91 × 10	-2		C1RL	225.37	-0.61	1.46 × 10	-2
C20orf24	279.74	-0.82	2.40 × 10	-3		C20orf24	134.51	-0.65	3.87 × 10	-2
C4orf3	337.68	-0.86	3.51 × 10	-3		C4orf3	175.93	-0.6	6.82 × 10	-2
CAB39	939.72	-0.95	1.86 × 10	-3		CAB39	465.56	-0.74	7.76 × 10	-3
CABIN1	281.84	0.77	3.90 × 10	-4		CABIN1	135.57	0.77	8.71 × 10	-2
CAMK2D	127.01	0.74	5.65 × 10	-2		CAMK2D	57.57	0.77	7.80 × 10	-2
CAP1	3322.13	-0.72	6.49 × 10	-3		CAP1	1553.18	-0.61	6.45 × 10	-2
CARD6	192.96	-0.94	4.26 × 10	-4		CARD6	100.25	-0.85	6.84 × 10	-4
CASP4	1446.09	-0.84	7.84 × 10	-3		CASP4	661.03	-0.69	2.12 × 10	-2
CBFA2T3	197.09	0.74	5.91 × 10	-2		CBFA2T3	90.69	1	3.64 × 10	-2
CCDC144A	209.83	-0.8	2.77 × 10	-2		CCDC144A	120.24	-1.01	1.20 × 10	-4
CCDC71L	151.13	-1.28	1.23 × 10	-3		CCDC71L	94.57	-1.38	1.44 × 10	-5
CCND3	776.73	-0.76	1.26 × 10	-2		CCND3	369.87	-0.63	9.35 × 10	-2
CCR3	105.43	0.87	6.76 × 10	-3		CCR3	55.37	1.48	1.31 × 10	-4
CCR4	80.76	0.8	2.85 × 10	-2		CCR4	55.73	0.89	1.25 × 10	-3
CD163	325.19	-1.06	5.90 × 10	-2		CD163	167.36	-1.8	9.11 × 10	-4
CD177	694.94	-3.73	1.06 × 10	-4		CD177	313.09	-4.35	4.70 × 10	-9
CD4	373.67	0.96	1.14 × 10	-2		CD4	164.57	1.32	3.68 × 10	-6
CD5	116.38	0.91	7.08 × 10	-2		CD5	55.54	1.33	2.21 × 10	-3
CD55	3149.45	-1.6	2.32 × 10	-4		CD55	1542.09	-1.86	2.18 × 10	-7
CD58	213.35	-1.24	5.13 × 10	-4		CD58	102.52	-0.59	5.51 × 10	-3
CD59	468.76	-0.93	5.13 × 10	-2		CD59	242.14	-1.02	1.73 × 10	-2
CD6	188.76	0.89	2.34 × 10	-2		CD6	83.37	1.04	7.11 × 10	-3
CD82	221.87	-0.7	2.76 × 10	-2		CD82	111.11	-0.53	6.10 × 10	-2
CD86	109.52	0.61	5.36 × 10	-2		CD86	62.46	0.73	4.04 × 10	-2
CDA	405.53	-1.2	4.42 × 10	-4		CDA	229.75	-1	6.36 × 10	-3
CDC25B	176.78	0.87	5.66 × 10	-2		CDC25B	86.9	1.04	1.48 × 10	-2
CDC42EP3	1529.16	-1.24	1.31 × 10	-4		CDC42EP3	641.65	-0.77	1.27 × 10	-2
CDK14	232.31	-0.92	8.73 × 10	-3		CDK14	128.49	-0.51	7.94 × 10	-2
CDKN2D	286.92	-0.77	3.39 × 10	-2		CDKN2D	149.35	-0.74	6.64 × 10	-2
CEACAM1	893.68	-2.02	2.84 × 10	-3		CEACAM1	446.97	-2.11	5.15 × 10	-8
CEACAM4	447.41	-1.24	1.37 × 10	-3		CEACAM4	223.65	-0.93	2.95 × 10	-3
CEBPB	2109.62	-1.17	6.64 × 10	-3		CEBPB	1196.5	-1.48	3.79 × 10	-4
CEBPD	1192.93	-1.27	3.15 × 10	-3		CEBPD	689.77	-1.77	2.48 × 10	-6
CEBPZOS	88.22	-1.04	1.83 × 10	-4		CEBPZOS	58.1	-1.13	1.35 × 10	-2
CECR1	666.71	0.5	3.14 × 10	-2		CECR1	292.68	0.52	5.04 × 10	-2
CHD1	736.45	-0.84	4.48 × 10	-4		CHD1	377.94	-0.67	4.29 × 10	-2
CHD7	737.22	-1.01	1.86 × 10	-2		CHD7	323.61	-0.73	5.79 × 10	-2
CHMP7	190.66	0.66	2.11 × 10	-2		CHMP7	81.9	0.77	1.07 × 10	-2
CHST2	151.17	-0.74	2.89 × 10	-2		CHST2	91.04	-1.16	5.04 × 10	-1
CHSY1	711.81	-1.37	1.59 × 10	-5		CHSY1	350.27	-1.08	6.21 × 10	-3
CHUK	154.53	-0.73	2.04 × 10	-2		CHUK	78.84	-0.67	6.88 × 10	-3
CIITA	659.52	0.79	5.23 × 10	-3		CIITA	299.78	1.02	4.16 × 10	-4
CKAP4	663.81	-1.47	8.80 × 10	-5		CKAP4	294.12	-1.26	3.37 × 10	-4
CLEC4D	304.28	-2.72	5.83 × 10	-7		CLEC4D	170.74	-2.87	4.84 × 10	-2
CLEC4E	710.95	-1.69	1.72 × 10	-4		CLEC4E	407.01	-1.79	9.75 × 10	0
CMTM1	112.29	-0.84	4.01 × 10	-2		CMTM1	58.74	-0.81	6.40 × 10	-2
CNIH4	264.53	-1.28	5.45 × 10	-3		CNIH4	132.55	-1.05	1.43 × 10	-3
CPD	1946.8	-1.11	9.27 × 10	-3		CPD	831.6	-1.11	1.55 × 10	-3
CPEB4	1404.1	-1.08	1.87 × 10	-3		CPEB4	676.08	-0.89	4.86 × 10	-2
CR1	3576.63	-1.82	1.86 × 10	-5		CR1	1451.47	-1.32	5.33 × 10	-4
CREB5	2514.08	-0.81	9.41 × 10	-3		CREB5	1236.42	-0.57	3.64 × 10	-2
CREBL2	107.85	0.55	3.67 × 10	-2		CREBL2	59.91	0.97	1.09 × 10	-4
CRISP3	86.1	-2.99	5.30 × 10	-8		CRISP3	57.13	-2.36	1.93 × 10	-6
CSF1R	282.68	0.83	2.26 × 10	-2		CSF1R	124.51	1.01	2.54 × 10	-3
CSGALNACT2	651.87	-1.44	6.47 × 10	-4		CSGALNACT2	342.2	-1.34	1.09 × 10	-4
CSNK1D	1088.42	-0.75	1.92 × 10	-2		CSNK1D	485.66	-0.72	1.04 × 10	-2
CSRNP1	266.53	-1.08	3.18 × 10	-2		CSRNP1	139.96	-1.27	4.21 × 10	-3
CST7	722.9	-1.55	1.67 × 10	-4		CST7	292.9	-1.7	1.44 × 10	-5
CTDP1	337.14	-0.83	2.32 × 10	-2		CTDP1	166.16	-0.95	2.19 × 10	-3
CUX1	868.36	-0.64	3.93 × 10	-3		CUX1	437.07	-0.58	2.57 × 10	-2
CX3CR1	587.99	0.69	9.94 × 10	-2		CX3CR1	229.25	0.96	3.64 × 10	-2
CXCR1	2957.26	-0.63	7.21 × 10	-2		CXCR1	1491.12	-0.73	5.82 × 10	-2
CYBA	1134.5	-0.56	7.54 × 10	-2		CYBA	527.45	-0.63	9.07 × 10	-2
CYP1B1	320.51	-1.35	4.88 × 10	-4		CYP1B1	152.66	-1.32	1.40 × 10	-3
CYP27A1	140.27	0.72	2.67 × 10	-2		CYP27A1	67.65	0.69	5.99 × 10	-2
CYP4F3	1766.61	-1.27	9.61 × 10	-4		CYP4F3	743.7	-0.82	3.69 × 10	-2
CYSTM1	279.19	-1.51	1.83 × 10	-3		CYSTM1	154.67	-1.6	2.36 × 10	-4
DACH1	83.61	-1.4	4.04 × 10	-3		DACH1	51.09	-1.1	1.75 × 10	-2
DEGS1	234.16	-0.69	1.76 × 10	-2		DEGS1	112.16	-0.69	1.35 × 10	-2
DGAT2	774	-1.15	4.15 × 10	-4		DGAT2	379.28	-0.75	4.42 × 10	-2
DHRS13	216.39	-1.2	5.79 × 10	-3		DHRS13	105.41	-1.09	2.38 × 10	-2
DIRC2	251.19	-1.27	9.90 × 10	-4		DIRC2	114.07	-0.75	3.80 × 10	-3
DOCK10	505.21	0.69	7.31 × 10	-2		DOCK10	217.85	0.93	2.95 × 10	-3
DOK3	1762.2	-1.07	9.98 × 10	-4		DOK3	796.59	-0.9	1.97 × 10	-2
DPY19L3	231.47	-0.96	1.48 × 10	-2		DPY19L3	139.74	-0.75	2.17 × 10	-2
DPYSL2	285.35	0.74	1.45 × 10	-3		DPYSL2	141.13	0.59	1.42 × 10	-2
DSE	299.57	-0.67	1.70 × 10	-2		DSE	147.8	-0.63	3.26 × 10	-2
DUSP1	1183.45	-0.88	1.85 × 10	-2		DUSP1	659.3	-1.22	4.18 × 10	-3
DYSF	2945.97	-1.09	4.00 × 10	-3		DYSF	1282.84	-1	1.50 × 10	-2
E2F3	313.77	-0.64	4.04 × 10	-2		E2F3	161.47	-0.61	6.17 × 10	-2
EIF2AK2	1044.62	-1.08	3.19 × 10	-3		EIF2AK2	531.38	-0.82	4.54 × 10	-6
EIF3B	225.1	0.66	7.96 × 10	-3		EIF3B	125.07	0.73	4.64 × 10	-5
EIF4E3	1362.6	-0.93	2.41 × 10	-3		EIF4E3	596.03	-0.67	1.25 × 10	-3
EIF4G3	656.84	-0.66	8.00 × 10	-3		EIF4G3	311.16	-0.65	9.02 × 10	-2
ELMSAN1	472.28	0.79	5.96 × 10	-3		ELMSAN1	238.15	0.92	3.84 × 10	-3
EMB	944.76	-1.55	2.69 × 10	-8		EMB	457.66	-0.94	8.43 × 10	-4
ENTPD1	2306.7	-0.93	1.63 × 10	-2		ENTPD1	1108.08	-0.59	3.56 × 10	-2
ENTPD7	137.02	-1.38	2.44 × 10	-2		ENTPD7	78.4	-1.52	3.90 × 10	-2
ERI1	103.64	-0.92	4.74 × 10	-2		ERI1	52.13	-0.76	8.09 × 10	-2
ERLIN1	258.9	-1.5	4.92 × 10	-3		ERLIN1	132.31	-1.75	4.01 × 10	-4
ESYT1	192.13	0.94	2.65 × 10	-3		ESYT1	93.27	0.98	6.50 × 10	-3
ETS2	478.89	-1.06	1.26 × 10	-2		ETS2	256.65	-1.54	3.70 × 10	-5
EXOC6	335.71	-1.33	2.90 × 10	-8		EXOC6	166.52	-0.88	7.74 × 10	-3
EXT1	164.98	-0.77	1.51 × 10	-2		EXT1	101.09	-1.08	5.56 × 10	-4
F5	1143.49	-1.58	7.73 × 10	-7		F5	555.12	-1.24	1.18 × 10	-3
FAIM3	293.03	0.69	3.98 × 10	-2		FAIM3	125.49	0.94	3.69 × 10	-2
FAM101B	1119.16	-1.41	1.83 × 10	-4		FAM101B	473.9	-1.03	7.77 × 10	-3
FAM102A	177.99	1.19	1.34 × 10	-2		FAM102A	84.26	1.15	7.76 × 10	-3
FAM126B	1270.82	-0.85	2.77 × 10	-2		FAM126B	634.91	-0.77	2.86 × 10	-3
FAM129B	107.07	-0.56	5.14 × 10	-2		FAM129B	53.74	-0.9	7.09 × 10	-2
FAM172A	171.26	-0.84	2.99 × 10	-3		FAM172A	85.22	-0.63	4.25 × 10	-2
FAM217B	262.73	-1.09	1.56 × 10	-2		FAM217B	125.53	-1.09	5.18 × 10	-3
FAM65A	211.55	0.6	7.00 × 10	-2		FAM65A	103.74	0.88	3.32 × 10	-2
FBXL5	2133.58	-1.22	1.86 × 10	-5		FBXL5	1013.94	-0.73	4.61 × 10	-2
FBXW2	533.38	-0.72	2.69 × 10	-2		FBXW2	276.24	-0.67	6.02 × 10	-2
FCAR	848.11	-2.35	1.83 × 10	-6		FCAR	428.55	-2.28	3.55 × 10	-1
FCER1G	1074.2	-0.97	9.90 × 10	-4		FCER1G	576.42	-0.94	2.98 × 10	-2
FEM1C	319.35	-1.02	5.01 × 10	-4		FEM1C	145.37	-0.84	3.14 × 10	-4
FES	308.21	-0.77	5.83 × 10	-2		FES	152.22	-0.69	4.96 × 10	-2
FGD4	725.95	-1.43	6.80 × 10	-4		FGD4	391.49	-1.36	2.48 × 10	-5
FKBP5	2217.8	-1.86	1.02 × 10	-2		FKBP5	1174.99	-2.49	4.34 × 10	-9
FLOT1	745.45	-1.23	9.61 × 10	-4		FLOT1	351.36	-1.09	8.63 × 10	-3
FLOT2	1822.23	-1.04	2.33 × 10	-3		FLOT2	787.09	-0.96	5.98 × 10	-4
FNDC3A	369.7	-0.68	2.40 × 10	-2		FNDC3A	178.07	-0.62	6.55 × 10	-3
FNDC3B	1354.73	-0.95	8.83 × 10	-3		FNDC3B	720.8	-0.8	4.03 × 10	-2
FOSL2	1876.9	-0.92	6.24 × 10	-3		FOSL2	889.12	-0.83	2.48 × 10	-2
FPR2	1051.96	-0.95	7.01 × 10	-3		FPR2	533.09	-0.91	2.57 × 10	-2
FUT7	133.54	-1.22	4.00 × 10	-3		FUT7	55.9	-1.28	1.14 × 10	-2
GADD45A	92.52	-1.66	5.70 × 10	-3		GADD45A	62.95	-2.04	6.48 × 10	-8
GADD45B	218.35	-0.85	6.43 × 10	-2		GADD45B	87.89	-1.04	4.69 × 10	-4
GAPDH	2445.58	-0.59	1.63 × 10	-2		GAPDH	1148.69	-0.64	9.07 × 10	-2
GATS	108.57	-0.57	3.92 × 10	-2		GATS	56.13	-0.74	8.95 × 10	-2
GBGT1	239.05	-0.62	7.26 × 10	-2		GBGT1	108.16	-0.81	2.56 × 10	-2
GBP4	324.72	0.81	8.74 × 10	-2		GBP4	128.79	0.97	1.03 × 10	-2
GCA	2849.54	-1.54	5.60 × 10	-5		GCA	1501.87	-1.3	2.02 × 10	-3
GK	735.55	-1.04	2.55 × 10	-3		GK	373.84	-0.93	6.49 × 10	-2
GK5	169	-0.91	3.60 × 10	-2		GK5	133.04	-1.6	1.04 × 10	-3
GLTSCR2	358.19	0.56	4.42 × 10	-2		GLTSCR2	184.97	0.79	2.14 × 10	-2
GM2A	324.96	-0.6	6.84 × 10	-2		GM2A	174.47	-0.93	1.42 × 10	-2
GNG10	266.93	-0.95	2.95 × 10	-2		GNG10	145.99	-1.01	2.57 × 10	-2
GNG2	623.7	-0.74	9.29 × 10	-3		GNG2	287.02	-0.58	4.35 × 10	-2
GNG5	225.04	-0.59	3.96 × 10	-2		GNG5	117.24	-0.82	3.02 × 10	-2
GPR132	278.46	-1.03	4.27 × 10	-4		GPR132	136.62	-1.15	3.68 × 10	-6
GPR141	239.49	-1.65	1.96 × 10	-4		GPR141	112.44	-1.39	4.08 × 10	-4
GPR155	475.08	-0.76	2.53 × 10	-2		GPR155	237.22	-0.58	9.33 × 10	-2
GPR160	112.13	-1.24	4.79 × 10	-3		GPR160	61.52	-1.51	2.48 × 10	-5
GPR27	291.11	-1.24	2.96 × 10	-4		GPR27	151.79	-1.14	9.44 × 10	-8
GPR97	1158.98	-1.36	1.01 × 10	-3		GPR97	644.58	-1.42	7.60 × 10	-4
GRAMD1A	697.81	-0.79	2.96 × 10	-2		GRAMD1A	316.73	-0.88	1.15 × 10	-3
GTDC1	192.83	-0.73	6.51 × 10	-2		GTDC1	108.96	-1.07	3.14 × 10	-4
GTF2H2	147.08	-1.24	3.78 × 10	-4		GTF2H2	99.91	-1.04	8.00 × 10	-3
GTF2H2C	147.21	-1	5.69 × 10	-3		GTF2H2C	54.74	-0.65	6.33 × 10	-2
GTPBP1	838.56	-1.01	8.70 × 10	-3		GTPBP1	386.9	-0.93	5.03 × 10	-3
GYG1	501.88	-2.23	1.59 × 10	-5		GYG1	267.62	-2.49	1.09 × 10	-8
H6PD	454.88	-0.87	7.01 × 10	-3		H6PD	214.33	-0.71	1.34 × 10	-2
HAT1	88.17	-0.94	4.23 × 10	-2		HAT1	56.93	-0.87	3.69 × 10	-2
HDAC4	672.34	-0.66	6.34 × 10	-2		HDAC4	337.08	-0.52	6.42 × 10	-2
HEBP2	596.71	-0.92	1.70 × 10	-3		HEBP2	287.5	-0.53	4.84 × 10	-2
HECW2	101.6	-0.88	5.60 × 10	-2		HECW2	65.14	-0.9	3.97 × 10	-2
HGF	144	-1.67	1.41 × 10	-3		HGF	87.79	-1.75	1.09 × 10	-4
HIATL1	327.7	-0.98	2.42 × 10	-4		HIATL1	155.3	-0.68	3.64 × 10	-2
HIF1A	1280.17	-1.1	4.14 × 10	-4		HIF1A	652.45	-1.09	2.44 × 10	-4
HIP1	536.22	-0.99	1.83 × 10	-4		HIP1	290.85	-0.61	3.20 × 10	-2
HIPK2	789.76	-0.78	4.21 × 10	-2		HIPK2	439.54	-1.11	1.19 × 10	-2
HK3	731.72	-1.42	1.29 × 10	-4		HK3	363.66	-1.35	3.99 × 10	-5
HLA-DMB	184.78	0.61	7.59 × 10	-2		HLA-DMB	79.11	1	3.16 × 10	-4
HLA-DRB5	220.29	0.59	7.92 × 10	-2		HLA-DRB5	93.86	0.94	6.45 × 10	-3
HLX	413.31	-1.61	6.28 × 10	-4		HLX	226.34	-1.97	3.30 × 10	-8
HMGB2	414.95	-1.62	2.13 × 10	-4		HMGB2	242.53	-1.21	1.21 × 10	-2
HP	188.68	-2.59	5.30 × 10	-8		HP	88.16	-2.17	8.81 × 10	-4
HRH2	1813.55	-1.12	1.24 × 10	-2		HRH2	860.06	-1.06	3.19 × 10	-3
HSH2D	390.83	0.75	2.83 × 10	-2		HSH2D	185.35	1.07	4.03 × 10	-4
HVCN1	175.11	0.61	2.04 × 10	-2		HVCN1	78.95	1.05	1.35 × 10	-2
IDI1	343.57	-1.92	2.32 × 10	-4		IDI1	193.48	-2.12	9.11 × 10	-9
IFI16	1794.48	-0.81	3.06 × 10	-2		IFI16	780.53	-0.61	5.99 × 10	-2
IFIT1B	211.81	0.7	1.18 × 10	-2		IFIT1B	163.6	0.54	8.77 × 10	-2
IFNAR1	1184.17	-1.03	1.40 × 10	-3		IFNAR1	584.13	-0.89	5.71 × 10	-3
IFNGR1	1173.47	-1.02	2.21 × 10	-3		IFNGR1	647.04	-0.87	1.35 × 10	-2
IKZF2	113.84	0.83	2.29 × 10	-3		IKZF2	75.05	0.8	5.53 × 10	-2
IL17RA	3130.96	-0.82	1.60 × 10	-2		IL17RA	1349.65	-0.68	8.25 × 10	-2
IL18R1	478.49	-2.41	1.05 × 10	-5		IL18R1	305.16	-2.77	3.82 × 10	-9
IL18RAP	850.22	-2.04	6.69 × 10	-6		IL18RAP	394.52	-2.36	1.04 × 10	-3
IL1R1	196.95	-0.79	6.43 × 10	-2		IL1R1	112.88	-0.76	2.32 × 10	-2
IL1R2	1153.71	-2.02	2.99 × 10	-3		IL1R2	752.7	-2.7	1.00 × 10	0
IL1RAP	729.49	-1.22	9.65 × 10	-3		IL1RAP	433.51	-1.14	5.99 × 10	-3
IL4R	1601.51	-1.45	1.71 × 10	-3		IL4R	733.66	-1.38	1.56 × 10	-5
IL7R	1082.7	0.81	4.48 × 10	-2		IL7R	461.65	1.19	8.13 × 10	-3
IMPA2	249.93	-0.6	7.94 × 10	-2		IMPA2	137.88	-0.67	1.35 × 10	-2
INADL	135.45	0.96	2.08 × 10	-2		INADL	78.89	1.12	3.43 × 10	-2
INTS6	712.95	-0.72	2.77 × 10	-3		INTS6	381.16	-0.61	7.49 × 10	-4
IQSEC1	2603.15	-0.56	7.76 × 10	-2		IQSEC1	1164.93	-0.58	9.73 × 10	-2
IRAK3	2158.97	-1.82	2.20 × 10	-4		IRAK3	1112.56	-1.9	1.73 × 10	-7
IRF4	83.8	0.95	1.48 × 10	-2		IRF4	53.05	0.87	4.40 × 10	-2
IRS2	723.85	-1.14	7.03 × 10	-3		IRS2	416.91	-1.53	1.77 × 10	-6
ITGAM	1535.22	-0.96	9.11 × 10	-3		ITGAM	699.88	-1.01	8.74 × 10	-3
ITGB7	132.74	0.85	2.97 × 10	-2		ITGB7	56.96	0.88	2.54 × 10	-2
IVNS1ABP	1124.4	-1.09	5.13 × 10	-4		IVNS1ABP	558.22	-0.87	2.65 × 10	-3
JAK3	1081.04	-0.85	3.64 × 10	-2		JAK3	504.11	-0.8	5.98 × 10	-2
JUNB	1954.14	-0.95	2.42 × 10	-2		JUNB	963.77	-1.07	1.63 × 10	-2
KAT6A	2050.71	-0.66	4.51 × 10	-2		KAT6A	973.68	-0.53	1.52 × 10	-2
KCNE1	215.26	-1.95	6.75 × 10	-4		KCNE1	107.59	-1.67	3.49 × 10	-4
KCNJ15	1610.87	-0.76	4.92 × 10	-2		KCNJ15	797.95	-0.62	9.12 × 10	-2
KIAA0040	1326.73	-0.72	4.69 × 10	-2		KIAA0040	639.42	-0.8	4.97 × 10	-2
KIAA0226L	374.31	-1.18	2.90 × 10	-3		KIAA0226L	172.71	-0.91	2.71 × 10	-3
KIF1B	849.37	-1.53	6.72 × 10	-5		KIF1B	401.11	-1.14	3.19 × 10	-3
KLF6	2242.57	-0.71	1.14 × 10	-2		KLF6	1081.07	-0.57	8.59 × 10	-2
KLHL2	522.36	-1.34	3.33 × 10	-3		KLHL2	260.18	-1.25	4.99 × 10	-4
KREMEN1	556.07	-0.99	2.73 × 10	-2		KREMEN1	244.96	-0.86	7.94 × 10	-3
LAMTOR5	149.88	-0.83	2.89 × 10	-2		LAMTOR5	92.49	-0.86	3.69 × 10	-2
LBH	375.7	0.64	3.52 × 10	-2		LBH	159.52	0.61	7.83 × 10	-2
LBR	1269.88	-0.8	1.71 × 10	-3		LBR	565.18	-0.53	9.02 × 10	-2
LDHA	752.44	-1.72	9.97 × 10	-6		LDHA	382.05	-1.64	5.06 × 10	-8
LDLRAP1	144.63	0.62	4.71 × 10	-2		LDLRAP1	76.55	1.02	9.94 × 10	-4
LEF1	269.21	0.93	6.55 × 10	-2		LEF1	139.5	1.33	4.60 × 10	-4
LFNG	275.81	0.79	2.46 × 10	-2		LFNG	138.03	1.29	1.77 × 10	-4
LGALS8	588.43	-0.99	1.37 × 10	-4		LGALS8	293.24	-0.85	1.06 × 10	-2
LILRA5	803.34	-1.05	8.93 × 10	-3		LILRA5	515.53	-1.17	1.45 × 10	-2
LILRA6	679.98	-0.71	6.26 × 10	-2		LILRA6	298.43	-0.78	3.64 × 10	-2
LILRB3	1518.95	-0.73	2.45 × 10	-2		LILRB3	738.56	-0.66	7.32 × 10	-2
LIMK2	1709.72	-0.97	1.13 × 10	-2		LIMK2	777.85	-0.81	3.08 × 10	-2
LIN54	162.99	-0.61	3.56 × 10	-2		LIN54	98.17	-0.71	4.24 × 10	-2
LMNB1	546.61	-1.41	2.08 × 10	-3		LMNB1	249.77	-1.1	4.11 × 10	-3
LMTK2	595.17	-0.99	2.15 × 10	-4		LMTK2	270.73	-0.72	4.78 × 10	-4
LPXN	149.45	0.55	3.91 × 10	-2		LPXN	70.22	0.56	8.88 × 10	-2
LRBA	453.84	0.55	1.52 × 10	-2		LRBA	208.43	0.56	7.71 × 10	-2
LRG1	724.81	-1.61	3.90 × 10	-4		LRG1	360.69	-1.64	1.94 × 10	-5
LRRC8B	95.55	0.55	3.40 × 10	-2		LRRC8B	56.64	0.55	7.05 × 10	-2
LRRFIP2	314.42	-1.01	9.30 × 10	-4		LRRFIP2	149.11	-0.71	5.03 × 10	-3
LRRN1	103.43	-1.75	6.89 × 10	-4		LRRN1	60.85	-2.16	2.72 × 10	-6
LTB4R	417.49	-1.1	1.07 × 10	-3		LTB4R	203.65	-1.1	7.00 × 10	-5
LY9	106.62	0.93	1.06 × 10	-2		LY9	55.54	1.24	5.56 × 10	-4
MAFG	167.45	-1.13	5.00 × 10	-3		MAFG	78.11	-0.98	5.05 × 10	-3
MANSC1	425.86	-1.25	7.26 × 10	-5		MANSC1	232.09	-0.97	5.65 × 10	-4
MAP2K6	493.14	-1.75	3.93 × 10	-5		MAP2K6	253.14	-1.19	1.87 × 10	-8
MAP3K14	131.25	0.61	2.23 × 10	-2		MAP3K14	63.42	0.96	6.91 × 10	-2
MAPK14	2258.6	-1.32	8.01 × 10	-5		MAPK14	1078.49	-1.13	2.90 × 10	-4
MAPK3	247.27	-0.54	9.12 × 10	-2		MAPK3	115.17	-0.64	7.12 × 10	-2
MARC1	370.79	-1.2	2.30 × 10	-3		MARC1	212.8	-0.85	2.16 × 10	-2
MARCKS	769.89	-0.86	3.79 × 10	-3		MARCKS	404.65	-0.89	3.02 × 10	-2
MB21D1	162.32	-1.17	1.56 × 10	-3		MB21D1	89.81	-1.11	2.74 × 10	-5
MCEMP1	396.79	-3.07	5.40 × 10	-5		MCEMP1	183.63	-2.62	1.68 × 10	-6
MCTP2	2298.52	-1.5	1.35 × 10	-4		MCTP2	1068.66	-1.2	1.58 × 10	-4
MEF2A	507.37	-1.14	3.21 × 10	-4		MEF2A	246.55	-0.82	1.35 × 10	-2
METRNL	214.37	-0.56	6.51 × 10	-2		METRNL	109.7	-0.79	4.96 × 10	-3
METTL9	875.71	-1.32	1.35 × 10	-4		METTL9	556.38	-0.81	5.84 × 10	-3
MGAM	3961.38	-1.17	4.41 × 10	-3		MGAM	1742.86	-0.97	1.40 × 10	-2
MICAL2	1923.77	0.58	1.93 × 10	-2		MICAL2	1055.79	0.6	1.86 × 10	-2
MIDN	1148.5	-0.79	1.54 × 10	-2		MIDN	533.94	-0.71	5.14 × 10	-2
MILR1	85.36	-1.21	3.93 × 10	-4		MILR1	62.89	-0.69	8.71 × 10	-2
MKNK1	799.21	-1.42	9.61 × 10	-4		MKNK1	428.93	-1.37	4.44 × 10	-4
MLKL	476.58	-1.06	6.21 × 10	-4		MLKL	266.19	-0.67	7.52 × 10	-2
MLLT1	323.21	-1.06	9.30 × 10	-3		MLLT1	156.65	-0.93	2.71 × 10	-3
MMP25	2387.91	-0.85	1.15 × 10	-2		MMP25	1206.3	-0.72	6.91 × 10	-2
MMP8	77.46	-1.17	1.05 × 10	-2		MMP8	86.74	-2.01	6.23 × 10	-3
MMP9	1935.18	-2.88	4.09 × 10	-7		MMP9	852.46	-3.02	2.44 × 10	-2
MPZL3	717.43	-1	1.71 × 10	-3		MPZL3	314.64	-0.89	3.26 × 10	-3
MSL3	878.48	-1.33	1.72 × 10	-4		MSL3	443.07	-1.17	3.59 × 10	-4
MSRA	134.61	-1.17	3.63 × 10	-3		MSRA	62.4	-0.91	1.25 × 10	-3
MSRB1	1279.62	-0.74	2.93 × 10	-2		MSRB1	595.5	-0.67	9.07 × 10	-2
MTHFS	98.33	-1.26	3.74 × 10	-3		MTHFS	59.39	-1.03	3.41 × 10	-2
MTMR3	1572.5	-0.65	5.32 × 10	-2		MTMR3	753.93	-0.56	9.26 × 10	-2
MUC16	96.75	1.3	8.75 × 10	-2		MUC16	102.61	-1.72	4.64 × 10	-5
MXD1	6446.32	-0.84	2.06 × 10	-2		MXD1	3161.26	-0.77	3.64 × 10	-2
MXD3	456.93	-1.57	4.82 × 10	-4		MXD3	223.85	-1.33	5.21 × 10	-4
NAB1	131.59	0.56	2.81 × 10	-2		NAB1	69.8	0.63	5.88 × 10	-2
NABP1	3831.52	-1.19	2.92 × 10	-4		NABP1	1904.53	-0.66	4.58 × 10	-3
NAIP	2147.38	-1.22	3.28 × 10	-3		NAIP	927.95	-0.97	2.27 × 10	-2
NAMPT	9368.41	-1.1	1.84 × 10	-3		NAMPT	4561.61	-0.88	1.32 × 10	-2
NARF	398.67	-0.55	7.70 × 10	-2		NARF	219.95	-0.78	1.15 × 10	-2
NATD1	610.24	-0.68	4.87 × 10	-2		NATD1	260.15	-0.57	4.75 × 10	-2
NCF4	1196.45	-0.8	9.65 × 10	-3		NCF4	575.43	-0.69	7.43 × 10	-2
NCOA4	5412.88	0.56	1.39 × 10	-2		NCOA4	3051.36	0.61	3.96 × 10	-2
NDEL1	1348.2	-0.77	8.67 × 10	-3		NDEL1	652.96	-0.64	8.47 × 10	-2
NDST1	548.65	-0.89	9.21 × 10	-3		NDST1	239.18	-0.95	5.35 × 10	-4
NDST2	269.47	-0.93	3.66 × 10	-2		NDST2	135.17	-1.47	1.60 × 10	-6
NFIL3	359.27	-0.91	1.53 × 10	-3		NFIL3	179.06	-0.91	1.81 × 10	-3
NFKBIA	683.5	-1.05	4.76 × 10	-3		NFKBIA	349.11	-1.36	3.70 × 10	-5
NFKBIZ	930.05	-1	5.45 × 10	-3		NFKBIZ	448.17	-0.92	1.23 × 10	-3
NIPAL3	137.8	0.58	4.91 × 10	-2		NIPAL3	78.19	0.67	4.17 × 10	-2
NLRC4	404.33	-0.97	2.53 × 10	-2		NLRC4	213.82	-1.1	2.65 × 10	-3
NQO2	469.96	-0.88	3.63 × 10	-3		NQO2	235.41	-0.65	6.34 × 10	-2
NSUN7	120.74	-1.84	1.82 × 10	-4		NSUN7	65.23	-1.25	2.33 × 10	-2
NTNG2	549.47	-1.19	2.08 × 10	-3		NTNG2	275.55	-1.35	4.67 × 10	-9
NUP210	321.8	0.58	2.89 × 10	-2		NUP210	140.76	0.77	4.55 × 10	-3
OAS2	409.82	0.75	4.61 × 10	-2		OAS2	163.21	0.75	1.90 × 10	-3
OSBPL9	371.53	-1.02	3.51 × 10	-3		OSBPL9	184.86	-0.69	7.10 × 10	-2
OSCAR	168.34	-0.73	2.19 × 10	-2		OSCAR	73.73	-0.86	1.35 × 10	-2
P2RX1	268.58	-0.64	8.17 × 10	-2		P2RX1	114.46	-0.66	2.94 × 10	-2
P2RX7	99.91	0.65	8.51 × 10	-2		P2RX7	52.66	0.81	4.69 × 10	-2
P2RY10	107.26	1.11	5.47 × 10	-2		P2RY10	53.2	1.24	1.91 × 10	-2
P2RY8	231.83	0.61	8.87 × 10	-2		P2RY8	106.39	0.88	2.72 × 10	-2
PADI2	1315.66	-0.68	1.95 × 10	-2		PADI2	506.77	-0.68	8.90 × 10	-3
PADI4	914.59	-1.88	9.97 × 10	-6		PADI4	392.72	-1.41	9.94 × 10	-4
PBXIP1	418.12	0.6	2.21 × 10	-2		PBXIP1	175.91	0.67	7.13 × 10	-2
PCGF3	314.41	-1	5.48 × 10	-5		PCGF3	148.17	-0.75	6.82 × 10	-2
PCNX	2352.17	-1.15	5.58 × 10	-4		PCNX	1062.75	-0.8	1.25 × 10	-3
PDZD8	526.82	-0.74	5.22 × 10	-3		PDZD8	318.35	-0.65	5.91 × 10	-2
PEA15	126.66	0.65	3.78 × 10	-2		PEA15	58.91	0.98	6.83 × 10	-3
PELI1	1403.79	-0.96	1.92 × 10	-2		PELI1	681.45	-1.04	4.24 × 10	-3
PFKFB2	771.32	-2.87	1.91 × 10	-4		PFKFB2	393.61	-3.11	3.05 × 10	0
PFKFB3	1879.1	-2.34	1.78 × 10	-4		PFKFB3	836.07	-2.26	2.18 × 10	-9
PFKFB4	479.27	-0.84	2.25 × 10	-2		PFKFB4	211.85	-0.72	2.12 × 10	-2
PGD	1398.9	-1.35	1.23 × 10	-5		PGD	674.74	-1.23	1.46 × 10	-4
PGLYRP1	219.09	-1.79	4.41 × 10	-6		PGLYRP1	133.36	-1.66	3.80 × 10	-5
PGM1	124.52	-1.03	5.43 × 10	-3		PGM1	55.41	-0.66	5.63 × 10	-2
PGS1	1115.65	-1.26	1.07 × 10	-2		PGS1	544.57	-1.05	4.73 × 10	-3
PHACTR1	151.1	-1.14	6.94 × 10	-3		PHACTR1	66.97	-1.48	1.74 × 10	-4
PHC2	1482.69	-0.94	1.77 × 10	-2		PHC2	703.3	-1.1	2.61 × 10	-3
PHTF1	279.71	-1.54	2.65 × 10	-3		PHTF1	133.62	-1.47	7.10 × 10	-5
PI3	177.06	1.12	3.14 × 10	-2		PI3	95.56	1.44	2.04 × 10	-3
PIEZO1	254.17	0.64	5.76 × 10	-2		PIEZO1	116.36	0.82	3.63 × 10	-3
PIGX	102.42	0.59	5.61 × 10	-2		PIGX	59.97	0.96	5.91 × 10	-3
PIM3	241.23	-0.89	4.26 × 10	-3		PIM3	121.85	-0.69	2.48 × 10	-2
PITHD1	440.44	0.55	2.52 × 10	-2		PITHD1	249.19	0.53	6.22 × 10	-2
PLB1	269.44	-1.02	6.10 × 10	-3		PLB1	91.53	-0.67	8.45 × 10	-2
PLBD1	1832.76	-1.29	4.93 × 10	-4		PLBD1	882.14	-1.25	4.15 × 10	-4
PLCG1	161.82	0.84	1.15 × 10	-2		PLCG1	85.16	0.93	3.80 × 10	-2
PLEKHO1	513.03	0.62	5.55 × 10	-2		PLEKHO1	223.75	1.05	6.38 × 10	-5
PLIN3	201.39	-0.6	4.58 × 10	-2		PLIN3	94.44	-0.86	2.95 × 10	-3
PLIN5	141.57	-1.26	7.89 × 10	-3		PLIN5	76.2	-1.3	5.63 × 10	-4
PLK3	146.8	-0.8	9.82 × 10	-2		PLK3	82.58	-1.28	5.08 × 10	-4
PLSCR1	777.62	-1.53	6.47 × 10	-4		PLSCR1	417.29	-1.35	4.18 × 10	-4
PLXNC1	3532.19	-0.77	1.67 × 10	-2		PLXNC1	1720.98	-0.55	5.60 × 10	-2
POR	245.11	-1.01	5.53 × 10	-2		POR	128.24	-1.61	6.44 × 10	-7
PPP1R3B	1040.37	-0.94	1.20 × 10	-2		PPP1R3B	506.01	-0.82	7.11 × 10	-3
PPP1R3D	331.08	-1.22	1.01 × 10	-3		PPP1R3D	172.82	-1.13	5.01 × 10	-4
PPP4R2	297.56	-1.32	2.06 × 10	-4		PPP4R2	180.46	-1.08	3.42 × 10	-2
PROK2	942.93	-1.52	9.08 × 10	-7		PROK2	467.05	-1.17	2.27 × 10	-2
PRUNE2	82.7	-1.98	1.84 × 10	-3		PRUNE2	56.33	-2.36	1.75 × 10	-3
PSTPIP2	651.84	-1.7	3.28 × 10	-4		PSTPIP2	293.04	-1.62	5.94 × 10	-5
PTEN	2800.45	-1.1	9.39 × 10	-4		PTEN	1448.23	-0.53	3.90 × 10	-2
PTGER4	213.82	0.88	1.04 × 10	-3		PTGER4	112.4	0.79	3.26 × 10	-2
PTP4A1	114.2	-0.8	5.02 × 10	-2		PTP4A1	52.15	-0.93	4.59 × 10	-2
PTPN2	253.6	-0.81	3.78 × 10	-3		PTPN2	130.15	-0.73	2.83 × 10	-3
PTPN22	215.82	-1.1	2.66 × 10	-4		PTPN22	105.16	-0.84	6.26 × 10	-3
PVRL1	85.12	-0.76	7.24 × 10	-2		PVRL1	53.64	-0.73	4.87 × 10	-2
PXK	429.9	-1.01	2.13 × 10	-4		PXK	188.11	-0.91	4.06 × 10	-4
PXN	2139.35	-0.69	1.57 × 10	-2		PXN	977.87	-0.68	8.00 × 10	-2
PYGL	2602.74	-1.25	1.48 × 10	-4		PYGL	1168.51	-0.95	1.90 × 10	-5
QPCT	621.38	-1.2	2.65 × 10	-3		QPCT	294.94	-0.89	3.38 × 10	-2
QSOX1	265.4	-1.05	3.56 × 10	-3		QSOX1	146.36	-0.92	1.84 × 10	-3
RAB27A	697.94	-1.14	9.32 × 10	-6		RAB27A	338.61	-0.78	1.59 × 10	-2
RAB33B	170.23	-0.84	1.95 × 10	-2		RAB33B	80.24	-0.74	3.82 × 10	-2
RAB43	353.69	-0.9	4.37 × 10	-2		RAB43	184.72	-1.21	1.04 × 10	-3
RABGEF1	222.53	-1.3	1.23 × 10	-3		RABGEF1	117.79	-1.66	3.28 × 10	-5
RALB	720.53	-0.87	8.44 × 10	-3		RALB	365.71	-0.82	3.80 × 10	-3
RALGAPA2	1579.09	-1.06	8.93 × 10	-3		RALGAPA2	823.09	-1.05	1.74 × 10	-4
RASA2	512.01	-1.22	5.57 × 10	-4		RASA2	246	-1.1	4.14 × 10	-6
RASGRP1	236.91	0.55	9.09 × 10	-2		RASGRP1	120.93	0.77	9.02 × 10	-2
RB1CC1	492.7	-0.63	2.22 × 10	-2		RB1CC1	229.93	-0.56	6.87 × 10	-2
RBM47	1076.31	-0.91	2.12 × 10	-2		RBM47	514.77	-0.67	5.99 × 10	-2
RBMS1	901.82	-1.12	6.87 × 10	-5		RBMS1	488.27	-0.91	1.42 × 10	-3
RBPJ	709.18	-0.85	6.47 × 10	-4		RBPJ	346.02	-0.58	8.02 × 10	-2
RCAN3	197.29	0.72	8.88 × 10	-2		RCAN3	105.97	0.93	1.43 × 10	-2
RGL4	154.06	-2.42	1.89 × 10	-6		RGL4	90.25	-2.13	4.48 × 10	-7
RGS19	478.27	-0.58	5.97 × 10	-2		RGS19	244.69	-0.52	9.21 × 10	-2
RGS2	2418.37	-0.71	3.09 × 10	-2		RGS2	1227.19	-0.71	4.19 × 10	-2
RHOB	271.52	0.57	8.70 × 10	-2		RHOB	149.49	0.75	7.90 × 10	-2
RHOU	100.32	-0.88	2.14 × 10	-2		RHOU	62.83	-0.9	5.42 × 10	-2
RIN3	1268.45	-0.66	8.63 × 10	-3		RIN3	591.2	-0.71	4.69 × 10	-3
RLIM	694.16	-1.02	5.45 × 10	-5		RLIM	369.41	-0.68	4.22 × 10	-2
RNF146	223.31	-0.79	9.41 × 10	-3		RNF146	121.53	-0.66	4.69 × 10	-2
RNF149	2650.08	-0.88	1.48 × 10	-2		RNF149	1270.58	-0.66	2.91 × 10	-2
ROPN1L	148.62	-1	1.59 × 10	-2		ROPN1L	73.93	-1.04	1.01 × 10	-4
RPH3A	68.95	-1.12	6.50 × 10	-2		RPH3A	68.57	-1.63	3.70 × 10	-5
RSBN1	285.02	-1.29	1.80 × 10	-4		RSBN1	144.18	-0.87	5.83 × 10	-2
S100A12	1319.48	-2.5	1.49 × 10	-7		S100A12	843.17	-2.35	2.39 × 10	-7
S100A6	1154.51	-0.97	2.41 × 10	-3		S100A6	583.12	-0.88	3.67 × 10	-2
S100A8	5622.69	-1.63	1.61 × 10	-4		S100A8	3683.98	-1.18	3.28 × 10	-2
S100A9	16033	-1.64	2.12 × 10	-5		S100A9	8509.11	-1.33	3.93 × 10	-3
S100P	232.96	-1.56	3.78 × 10	-4		S100P	127.58	-1.53	1.17 × 10	-3
SAMD8	364.13	-0.59	1.24 × 10	-2		SAMD8	196.99	-0.53	4.01 × 10	-2
SAMSN1	572.9	-2.32	1.64 × 10	-5		SAMSN1	313.56	-2.41	2.15 × 10	-6
SBNO2	1344.9	-0.91	2.26 × 10	-2		SBNO2	678.55	-1.23	1.27 × 10	-2
SCML4	254.18	0.59	3.19 × 10	-2		SCML4	122.4	0.84	3.77 × 10	-3
SDCBP	3040.37	-0.81	6.28 × 10	-3		SDCBP	1547.66	-0.76	2.27 × 10	-2
SERPINB1	1252.15	-1.63	1.25 × 10	-5		SERPINB1	699.01	-1.5	1.35 × 10	-4
SFXN5	173.14	-0.81	4.03 × 10	-2		SFXN5	98.19	-0.83	4.98 × 10	-3
SH2B3	501.82	0.61	2.42 × 10	-2		SH2B3	260.41	1.05	5.58 × 10	-6
SH3BP5	412.13	-0.89	2.23 × 10	-2		SH3BP5	190.92	-1.29	8.99 × 10	-5
SH3GLB1	1031.19	-0.98	9.76 × 10	-3		SH3GLB1	508.66	-0.97	3.48 × 10	-3
SH3RF3	86.27	-1.7	5.55 × 10	-3		SH3RF3	54.98	-1.92	1.12 × 10	-7
SIGLEC10	289.7	0.86	5.22 × 10	-3		SIGLEC10	168.19	1.26	7.00 × 10	-5
SIGLEC5	167.44	-0.97	7.24 × 10	-2		SIGLEC5	71.43	-1.52	1.73 × 10	-2
SIGLEC9	492.84	-0.92	7.26 × 10	-3		SIGLEC9	246.5	-0.74	7.46 × 10	-2
SIPA1L2	736.98	-1.22	3.18 × 10	-2		SIPA1L2	348	-1.74	9.30 × 10	-5
SKIL	177.17	-0.76	1.26 × 10	-3		SKIL	102.06	-0.67	5.18 × 10	-2
SLA	2721.63	-1.08	3.32 × 10	-3		SLA	1349.99	-1.09	1.49 × 10	-3
SLC11A1	2681.48	-1	1.34 × 10	-2		SLC11A1	1370.2	-0.88	1.68 × 10	-2
SLC16A3	917.12	-0.66	3.69 × 10	-2		SLC16A3	448.26	-0.52	6.52 × 10	-2
SLC22A15	355.95	-0.93	4.11 × 10	-2		SLC22A15	169.21	-0.66	5.86 × 10	-2
SLC25A40	107.04	-1.13	4.91 × 10	-4		SLC25A40	55.92	-0.67	9.39 × 10	-3
SLC25A44	633.67	-0.62	2.89 × 10	-2		SLC25A44	299.88	-0.61	3.56 × 10	-2
SLC26A8	139.25	-1.49	3.07 × 10	-3		SLC26A8	73.49	-1.22	2.95 × 10	-3
SLC2A3	3400.6	-1.56	1.78 × 10	-4		SLC2A3	1517.52	-1.31	1.22 × 10	-3
SLC36A4	122.76	-0.95	1.98 × 10	-2		SLC36A4	66.61	-0.95	7.96 × 10	-4
SLC37A3	470.81	-1.94	1.14 × 10	-5		SLC37A3	216.43	-1.76	3.86 × 10	-9
SLC38A2	651.62	-0.82	1.12 × 10	-2		SLC38A2	305.66	-0.82	7.95 × 10	-4
SLC46A3	96.47	-0.98	1.67 × 10	-4		SLC46A3	53.37	-0.69	5.91 × 10	-2
SLC9A8	526.97	-1.04	3.15 × 10	-3		SLC9A8	241.05	-0.65	1.35 × 10	-2
SLCO4C1	236.67	-1.69	4.09 × 10	-7		SLCO4C1	106.88	-1.12	9.55 × 10	-5
SMAD3	167.33	0.84	3.63 × 10	-3		SMAD3	89.04	0.77	1.73 × 10	-2
SMOX	89.51	0.75	2.67 × 10	-2		SMOX	64.1	0.55	5.89 × 10	-2
SNX18	671.29	-0.86	2.51 × 10	-3		SNX18	339.25	-0.6	7.47 × 10	-2
SOCS3	917.63	-2.74	1.37 × 10	-4		SOCS3	406.95	-2.82	3.05 × 10	0
SPATA13	912.89	-0.64	7.83 × 10	-2		SPATA13	443.65	-0.62	6.28 × 10	-2
SPN	388.4	0.84	2.23 × 10	-2		SPN	190.04	0.67	2.44 × 10	-2
SPOCK2	380.62	1.07	7.77 × 10	-3		SPOCK2	184.09	1.46	4.53 × 10	-7
SPTLC2	948.44	-0.78	6.30 × 10	-2		SPTLC2	494.68	-1.05	8.13 × 10	-3
SRGN	4489.65	-0.82	1.36 × 10	-2		SRGN	2645.79	-0.74	8.32 × 10	-2
SRPK1	982.21	-1.53	1.81 × 10	-5		SRPK1	491.79	-1.08	1.43 × 10	-3
SSH1	503.61	-0.61	4.45 × 10	-2		SSH1	259.7	-0.64	7.16 × 10	-2
ST20	148.2	-0.78	2.05 × 10	-2		ST20	66.98	-0.76	9.77 × 10	-3
ST3GAL4	193.59	-1.26	5.03 × 10	-3		ST3GAL4	86.11	-1.02	1.50 × 10	-3
ST3GAL5	121.07	0.93	2.77 × 10	-3		ST3GAL5	76.3	0.92	5.01 × 10	-2
ST6GAL1	358.14	0.76	1.41 × 10	-2		ST6GAL1	169.37	0.59	6.06 × 10	-2
STARD7	240.36	0.58	8.63 × 10	-2		STARD7	110.61	0.58	3.92 × 10	-2
STK17A	425.49	-0.55	7.30 × 10	-2		STK17A	216.42	-0.55	2.12 × 10	-2
STK17B	2502.73	-1.21	3.86 × 10	-3		STK17B	1191.11	-1.08	4.02 × 10	-4
STOM	1202.52	-0.84	4.18 × 10	-2		STOM	715.87	-0.88	6.15 × 10	-2
STX11	695.73	-0.79	1.36 × 10	-2		STX11	321.3	-0.61	7.52 × 10	-2
SULT1B1	918.9	-1.49	8.40 × 10	-4		SULT1B1	486.84	-0.95	1.23 × 10	-3
SYNE1	2435.08	-0.76	6.87 × 10	-3		SYNE1	1142.42	-0.59	1.46 × 10	-2
SYTL3	236.17	-0.81	7.54 × 10	-2		SYTL3	124.14	-1.4	5.66 × 10	-5
TANC2	450.63	-1.25	1.52 × 10	-3		TANC2	232.23	-0.73	5.38 × 10	-2
TBC1D14	1185.54	-0.89	2.32 × 10	-2		TBC1D14	547.94	-1.09	1.71 × 10	-5
TBC1D15	212.73	-1.13	2.67 × 10	-4		TBC1D15	128.4	-0.83	6.76 × 10	-2
TBC1D8	188.32	-0.88	7.63 × 10	-2		TBC1D8	101.22	-1.49	1.44 × 10	-5
TCF7	588.91	1	1.80 × 10	-2		TCF7	258.15	1.14	6.55 × 10	-3
TENM1	329.53	-2.39	2.53 × 10	-5		TENM1	125.24	-2.29	6.23 × 10	-8
TGFA	202.36	-0.99	2.76 × 10	-2		TGFA	125.98	-1.14	1.82 × 10	-3
TIPARP	281.09	-0.85	2.06 × 10	-2		TIPARP	166.72	-1.06	1.13 × 10	-2
TLR2	1851.47	-0.98	1.21 × 10	-2		TLR2	922.72	-0.87	8.29 × 10	-3
TLR4	3015.64	-1.31	1.67 × 10	-4		TLR4	1595.87	-1.01	2.95 × 10	-3
TLR5	460.45	-1.36	5.69 × 10	-3		TLR5	244.86	-1.29	3.16 × 10	-4
TLR8	1429.03	-0.88	3.99 × 10	-3		TLR8	704.3	-0.69	4.89 × 10	-2
TM6SF1	95.14	-1.1	9.42 × 10	-4		TM6SF1	50.85	-0.57	6.94 × 10	-2
TMCO3	315.33	-0.87	1.71 × 10	-3		TMCO3	169.37	-0.95	3.70 × 10	-5
TMED8	346.87	-1.45	5.23 × 10	-4		TMED8	181.72	-1.22	5.97 × 10	-4
TMEM120A	179.09	-1.09	6.41 × 10	-3		TMEM120A	93.92	-1.25	3.71 × 10	-3
TMEM165	364.57	-0.99	1.82 × 10	-3		TMEM165	179.44	-0.72	7.92 × 10	-4
TMEM170B	368.17	-0.98	1.33 × 10	-2		TMEM170B	199.91	-0.67	2.57 × 10	-2
TMEM2	751.11	-0.82	1.81 × 10	-2		TMEM2	360	-0.55	4.63 × 10	-2
TMEM260	259.81	-1.18	5.17 × 10	-4		TMEM260	135.59	-1.12	4.66 × 10	-3
TMEM8A	346.34	-0.72	4.52 × 10	-2		TMEM8A	161.66	-0.55	4.82 × 10	-2
TMEM91	110.19	-0.85	4.13 × 10	-3		TMEM91	63.36	-0.82	2.45 × 10	-2
TNFSF13B	590.25	-1.06	8.83 × 10	-3		TNFSF13B	331.57	-1.26	1.16 × 10	-2
TNPO3	395.36	-0.78	1.68 × 10	-2		TNPO3	184.66	-0.73	1.66 × 10	-2
TP53I11	564.82	-1.23	1.78 × 10	-4		TP53I11	245.12	-1.15	3.70 × 10	-5
TPST1	130.72	-1.17	4.84 × 10	-2		TPST1	75.42	-1.19	6.84 × 10	-2
TRABD2A	125.88	1	2.41 × 10	-2		TRABD2A	64.95	1.39	3.50 × 10	-4
TRAF1	138.62	0.72	3.44 × 10	-2		TRAF1	63.85	0.9	4.22 × 10	-2
TRANK1	1341.27	0.55	9.07 × 10	-2		TRANK1	643.81	0.84	7.06 × 10	-2
TREML2	440.9	-0.84	2.92 × 10	-2		TREML2	209.35	-0.86	3.04 × 10	-2
TRIB1	387.78	-1	2.04 × 10	-2		TRIB1	226.87	-1.4	1.02 × 10	-3
TRIM25	2687.37	-1.11	8.22 × 10	-3		TRIM25	1214.21	-0.73	4.63 × 10	-2
TRIQK	119.94	-1.07	2.27 × 10	-2		TRIQK	60.42	-1.11	2.13 × 10	-2
TRPM2	135.95	-1.51	3.46 × 10	-3		TRPM2	63.68	-1.21	1.55 × 10	-3
TRPS1	425.23	-1.19	2.67 × 10	-3		TRPS1	198.87	-1.12	3.01 × 10	-2
TSEN34	335.03	-0.82	4.24 × 10	-2		TSEN34	177.44	-1.15	2.54 × 10	-3
TSPO	346.16	-0.79	2.59 × 10	-2		TSPO	160.3	-1.06	4.71 × 10	-3
TTN	524.57	0.71	7.38 × 10	-2		TTN	305.39	0.82	8.99 × 10	-2
TUBA4A	503.24	-0.91	3.22 × 10	-3		TUBA4A	231.96	-0.97	9.75 × 10	-3
TYW5	83.09	-1	1.48 × 10	-2		TYW5	64.77	-1.01	8.06 × 10	-4
UBXN2B	849.67	-0.99	3.63 × 10	-3		UBXN2B	432.01	-0.75	5.46 × 10	-3
UGCG	400.97	-2.09	1.71 × 10	-6		UGCG	233.83	-2.27	8.00 × 10	-7
ULK2	76.21	0.93	3.18 × 10	-2		ULK2	51.68	0.8	9.87 × 10	-2
UPP1	476.04	-1.63	1.25 × 10	-3		UPP1	257.3	-1.53	2.76 × 10	-4
USB1	392.53	-1	8.12 × 10	-3		USB1	206.15	-0.65	4.62 × 10	-2
VAPA	790.14	-0.95	4.03 × 10	-3		VAPA	405.64	-0.91	1.15 × 10	-3
VNN1	459.58	-2.01	6.55 × 10	-5		VNN1	163.09	-1.88	1.06 × 10	-4
VNN2	3306.4	-1.01	3.15 × 10	-3		VNN2	1715.5	-0.71	5.13 × 10	-2
WDFY3	3025.04	-1.29	5.38 × 10	-4		WDFY3	1355.68	-1.07	2.95 × 10	-3
WDR81	110.19	0.79	1.20 × 10	-2		WDR81	57.53	0.84	7.75 × 10	-2
WSB1	1659.96	-1.67	8.06 × 10	-7		WSB1	788.91	-1.18	1.75 × 10	-3
XBP1	220.77	-0.51	8.15 × 10	-2		XBP1	113.58	-0.78	1.60 × 10	-2
YIPF1	154.65	-0.92	2.23 × 10	-2		YIPF1	74.02	-0.67	9.38 × 10	-2
ZC3HAV1	1542.81	-0.6	9.71 × 10	-2		ZC3HAV1	690.58	-0.51	3.43 × 10	-2
ZDHHC3	552.99	-0.73	1.75 × 10	-2		ZDHHC3	297.67	-0.81	1.86 × 10	-2
ZFYVE16	610.94	-0.81	7.43 × 10	-3		ZFYVE16	351.92	-0.61	1.35 × 10	-2
ZNF254	91.47	-1.37	2.13 × 10	-5		ZNF254	58.98	-1.15	2.01 × 10	-2
ZNF281	442.37	-0.81	3.84 × 10	-3		ZNF281	228.23	-0.75	3.98 × 10	-3
ZNF319	170.3	-0.55	7.55 × 10	-2		ZNF319	94.27	-0.61	9.96 × 10	-2
ZNF429	141.25	-0.91	1.02 × 10	-5		ZNF429	75.02	-0.81	5.63 × 10	-3
ZNF438	258.76	-0.85	2.22 × 10	-2		ZNF438	129.71	-0.66	2.43 × 10	-2
ZNF445	1256.67	-1.45	8.77 × 10	-4		ZNF445	636.44	-1.36	3.93 × 10	-6
ZNF710	208.83	0.62	1.85 × 10	-2		ZNF710	113.36	1.11	3.16 × 10	-3
ZNF787	198.61	-0.9	4.81 × 10	-3		ZNF787	106.32	-0.69	1.19 × 10	-2
ABCB10	97.44	0.57	4.18 × 10	-3		AACS	60.32	-1.17	3.74 × 10	-2
ABCC3	77.55	0.9	2.01 × 10	-2		ABCA1	178.28	0.86	2.08 × 10	-2
ABCC4	148.24	0.81	6.49 × 10	-3		ABCA13	56.83	-1.05	4.42 × 10	-2
ABLIM1	318.44	0.76	4.76 × 10	-3		ABCA2	129.87	-0.53	4.39 × 10	-2
ABLIM3	57.79	0.9	3.91 × 10	-2		ABCC1	115.19	0.51	9.38 × 10	-2
ACACB	72.13	0.92	5.45 × 10	-3		ABL2	128.88	-1.02	2.30 × 10	-2
ACER3	152.02	-0.71	6.81 × 10	-2		ADAM8	552.2	-0.68	6.71 × 10	-2
ACP6	146.89	-0.97	1.91 × 10	-2		ADARB2	51.18	-1.58	3.05 × 10	-2
ACSL6	84.52	0.8	2.82 × 10	-2		ADIPOR2	82.53	0.59	6.10 × 10	-2
ACSS1	102.98	0.64	5.41 × 10	-3		ADRBK2	148.41	0.61	4.63 × 10	-2
ACSS3	217.55	-0.96	1.53 × 10	-3		ADSS	77.44	0.53	6.74 × 10	-2
ACTR2	2555.73	-0.6	1.33 × 10	-2		AIF1	150.69	0.63	4.42 × 10	-3
ACTR3	1532.27	-0.61	2.72 × 10	-2		AJAP1	73	-1.9	1.14 × 10	-2
ACVR1	54.82	0.88	3.28 × 10	-3		AKAP11	122.63	0.55	2.11 × 10	-2
ADAM9	150.17	-1.38	1.93 × 10	-5		ALDH5A1	110.39	0.6	6.15 × 10	-2
ADCY9	72.35	0.87	1.96 × 10	-2		ALDH7A1	52.92	-1.48	4.85 × 10	-2
ADD3	890.59	-0.54	4.30 × 10	-2		ALMS1	124.67	0.77	2.16 × 10	-2
ADORA2A	75.05	-1.07	5.45 × 10	-3		ALS2CR12	62.69	0.72	4.39 × 10	-2
AFF2	123.21	-0.75	7.81 × 10	-2		ANKRD33B	59.77	-0.54	4.75 × 10	-2
AGAP3	66.18	1.09	3.24 × 10	-4		ANKRD36	134.15	0.53	9.13 × 10	-2
AGAP4	92.51	0.57	5.04 × 10	-2		ANKRD52	66.89	0.7	9.85 × 10	-2
AGL	103.41	-0.68	5.26 × 10	-2		ANP32B	183.86	0.81	2.90 × 10	-4
AGO4	1382.78	-0.65	2.47 × 10	-2		APOBEC3C	166.38	0.73	3.94 × 10	-3
AGPAT9	190.06	-0.74	2.42 × 10	-2		ARHGAP17	117.69	0.7	3.97 × 10	-3
AHCYL2	67.56	0.67	5.52 × 10	-2		ARHGAP25	500.02	0.91	7.28 × 10	-3
AHSP	230.31	0.69	3.05 × 10	-2		ARHGEF40	282.61	-0.54	7.12 × 10	-2
AIM2	74.44	-1.08	8.70 × 10	-3		ARRDC3	398.24	0.76	8.35 × 10	-4
AKIRIN2	362.14	-0.65	1.52 × 10	-2		ATF7IP	492.7	0.7	2.13 × 10	-2
ALAS2	8693.66	0.67	5.47 × 10	-2		B4GALT4	54.6	-0.99	4.22 × 10	-2
ALPK1	1190.91	-0.79	1.49 × 10	-2		BAZ1B	116.45	0.73	1.31 × 10	-4
AMICA1	3585.63	-0.64	1.32 × 10	-2		BCOR	72.63	0.88	4.69 × 10	-2
AMN1	69.49	-0.84	5.58 × 10	-2		BIRC3	117.16	1.36	2.58 × 10	-4
ANK1	802.04	0.84	2.47 × 10	-2		BRPF1	58.55	0.62	7.74 × 10	-2
ANK3	109.87	0.73	3.59 × 10	-2		BTF3	306.62	0.53	9.41 × 10	-2
ANKH	397.89	0.73	1.24 × 10	-2		BTN3A1	338.46	0.83	6.64 × 10	-2
ANKRD9	64.38	0.89	4.32 × 10	-2		C15orf39	577.42	0.76	9.42 × 10	-3
ANPEP	1194.31	-0.52	7.38 × 10	-2		C5orf56	227.54	0.76	6.98 × 10	-3
ANXA1	580.5	-0.83	7.76 × 10	-3		C9orf89	58.02	-0.59	4.02 × 10	-2
AP1G1	719.18	-0.55	1.59 × 10	-3		CACNA1A	127.06	-1.28	4.83 × 10	-2
AP3B1	413.5	-0.56	8.58 × 10	-2		CACNA1D	57.27	-0.91	1.81 × 10	-2
AP5B1	1338.56	-0.66	2.75 × 10	-2		CACNA1E	90.03	-1.22	3.42 × 10	-2
APAF1	963.23	-0.79	1.82 × 10	-2		CAMK4	84.75	1.07	3.26 × 10	-2
APBA3	54.21	0.53	5.60 × 10	-2		CAND1	121.51	0.52	8.49 × 10	-2
APBB1IP	1565.24	-0.58	2.92 × 10	-2		CANT1	211.23	-0.52	1.06 × 10	-2
APH1B	161.07	-0.91	1.07 × 10	-2		CASS4	133.54	0.89	4.37 × 10	-3
APOBEC3A	1114.7	-0.92	8.73 × 10	-3		CBLL1	98.3	0.51	3.81 × 10	-2
APOBEC3D	52.12	0.83	2.25 × 10	-2		CBWD1	92.92	0.67	7.90 × 10	-2
APOBEC3F	76.86	0.75	1.03 × 10	-2		CBWD3	87.7	0.54	8.22 × 10	-2
ARFGAP3	178.65	-0.9	2.28 × 10	-3		CBX4	78.32	-0.7	4.51 × 10	-3
ARGLU1	568.86	-0.58	1.36 × 10	-2		CCDC88C	208.28	0.55	9.92 × 10	-2
ARHGAP15	864.92	-0.62	2.70 × 10	-2		CD28	69.05	1.44	3.93 × 10	-2
ARHGAP19	202.91	-0.85	5.66 × 10	-2		CD300LB	65.24	1.04	3.57 × 10	-2
ARHGAP26	2523.09	-0.56	6.12 × 10	-2		CD33	86.02	0.5	8.65 × 10	-2
ARHGEF10L	60.77	0.9	7.08 × 10	-2		CD3E	170.37	1.28	1.54 × 10	-2
ARHGEF12	628.54	0.71	6.64 × 10	-3		CD52	92.41	1.1	3.42 × 10	-3
ARID4A	425.96	-0.51	5.34 × 10	-2		CD74	1443.39	0.86	1.35 × 10	-2
ARID4B	603.53	-0.56	1.91 × 10	-2		CD96	92.33	0.79	3.04 × 10	-2
ARL10	81.83	1.17	9.98 × 10	-3		CDK5R1	69.24	-0.97	8.13 × 10	-4
ARL11	448.37	-0.62	4.28 × 10	-2		CHI3L1	253.63	0.77	3.38 × 10	-2
ARL6IP6	69.78	-1.08	1.47 × 10	-3		CHRNA7	77.32	-1.15	1.72 × 10	-2
ARPC2	1899.43	-0.7	3.30 × 10	-4		CLC	110.47	0.99	4.72 × 10	-2
ARPC3	737.75	-0.72	3.02 × 10	-3		CLEC2B	62.39	0.78	2.01 × 10	-2
ARPC5	1551.89	-0.73	1.52 × 10	-2		CNTNAP3B	145.74	-0.92	8.41 × 10	-2
ARRB2	2713.24	-0.56	6.28 × 10	-2		CNTRL	132.52	0.51	9.13 × 10	-2
ARRDC2	122.35	0.63	1.10 × 10	-2		CPVL	108.01	0.73	1.27 × 10	-2
ASNSD1	72.23	-0.54	8.94 × 10	-2		CRK	151.57	-0.53	3.22 × 10	-2
ATF6	711.53	-0.81	1.04 × 10	-2		CRTAP	119.61	0.65	5.54 × 10	-2
ATG3	327.02	-0.67	3.83 × 10	-2		CTSC	248.17	0.89	2.57 × 10	-4
ATIC	68.35	0.68	8.77 × 10	-2		CTSD	475.83	-0.65	8.31 × 10	-2
ATN1	85.58	0.68	4.39 × 10	-3		CYSLTR1	55.85	0.81	3.86 × 10	-2
ATP10A	142.06	0.65	3.78 × 10	-4		CYTIP	421.45	-0.57	6.04 × 10	-2
ATP5J2	82.44	-0.59	8.63 × 10	-3		DAAM2	108.2	-1.82	4.17 × 10	-3
ATP6V0D1	548.84	-0.51	3.80 × 10	-2		DCAF16	66.62	0.63	4.60 × 10	-2
ATP6V0E1	369.29	-0.51	4.97 × 10	-2		DDHD1	160.95	0.69	9.75 × 10	-2
ATXN1	919.98	-0.67	5.03 × 10	-3		DDX24	105.32	0.68	9.11 × 10	-4
ATXN7	923.81	-0.69	2.32 × 10	-2		DDX60	93.15	0.75	3.57 × 10	-2
AVIL	82.08	0.81	3.35 × 10	-2		DENND4C	123.55	0.59	1.82 × 10	-2
B3GNT8	90.72	-0.6	8.75 × 10	-2		DGAT1	74	-0.66	4.56 × 10	-2
B4GALT3	181.15	0.63	8.93 × 10	-3		DGKH	95.39	-1.02	7.76 × 10	-3
BCAM	70.94	1	2.09 × 10	-2		DHRS9	152.66	-1.46	4.71 × 10	-3
BCL11A	199.81	0.91	5.79 × 10	-3		DNAJC10	97.36	1.16	8.78 × 10	-4
BCL2L1	5245.49	0.6	7.37 × 10	-2		DOK2	67.12	0.65	8.41 × 10	-2
BLOC1S1	107.41	-0.62	8.58 × 10	-2		DUSP22	171.5	-0.52	3.07 × 10	-2
BOD1L1	2037.14	-0.55	1.11 × 10	-2		DUSP3	112.9	-0.75	8.59 × 10	-2
BRAF	644.54	-0.61	1.24 × 10	-2		DUSP7	57.62	0.8	4.72 × 10	-2
BRAT1	66.32	0.59	6.28 × 10	-2		EEF1A1	4000.88	0.67	6.34 × 10	-2
BRF1	79.38	0.58	1.83 × 10	-2		EEF2	1716.85	0.75	3.58 × 10	-2
BTBD11	56.16	0.87	9.49 × 10	-3		EPHB1	136.07	1.06	4.19 × 10	-2
BTN2A2	69.67	0.5	4.65 × 10	-2		EPPK1	98.89	-0.96	7.04 × 10	-2
C10orf128	76.63	0.99	2.24 × 10	-3		ERAP1	137.14	0.5	2.65 × 10	-2
C11orf54	111.71	-0.65	3.00 × 10	-2		ERCC6	86.28	0.64	8.99 × 10	-2
C12orf45	75.95	1.34	9.98 × 10	-3		ERV3-1	317.78	0.56	4.47 × 10	-2
C16orf72	3112.2	-0.82	2.74 × 10	-3		ESCO1	64.25	0.66	4.72 × 10	-2
C17orf85	289.59	-0.59	1.43 × 10	-3		EVI2A	110.03	0.63	1.00 × 10	-2
C18orf32	95.79	-0.81	3.12 × 10	-2		EVL	303.5	0.87	5.84 × 10	-2
C19orf43	157.97	-0.63	4.55 × 10	-3		FAM102B	67.88	-0.57	5.62 × 10	-2
C1GALT1	191.87	-0.55	5.45 × 10	-2		FAM13A	75.03	0.61	1.64 × 10	-2
C1GALT1C1	59.96	-0.84	1.78 × 10	-2		FAM160B1	231.14	-0.75	5.20 × 10	-4
C1orf162	398.44	-0.72	8.38 × 10	-3		FAM53B	149.08	0.75	3.34 × 10	-2
C2CD2L	122.97	0.57	3.71 × 10	-2		FAM78A	151.6	0.55	2.96 × 10	-2
C5orf45	54.97	0.86	2.93 × 10	-3		FARP1	92.06	-1.27	4.72 × 10	-2
C9orf72	580.92	-0.87	2.03 × 10	-3		FBN1	52.89	-1.9	8.21 × 10	-5
C9orf91	82.4	0.84	1.34 × 10	-2		FGL2	781.41	0.91	1.41 × 10	-5
CA1	1440.94	0.67	1.28 × 10	-2		FMN1	117.14	-1.6	2.78 × 10	-3
CA2	100.38	0.63	7.69 × 10	-2		FMNL3	82.6	0.98	4.93 × 10	-2
CA4	72.96	-1.44	1.71 × 10	-3		FNBP4	136.71	0.58	1.68 × 10	-2
CACUL1	740.96	-0.67	6.37 × 10	-3		FOS	295.86	-0.9	6.98 × 10	-3
CAD	54.84	1.05	2.29 × 10	-2		FRMD4B	111.11	-0.91	1.94 × 10	-2
CAMSAP1	99.52	0.74	6.94 × 10	-2		FUNDC2	69.08	0.78	1.82 × 10	-2
CAMTA2	271.3	-0.51	9.24 × 10	-2		FURIN	772.4	-0.6	3.32 × 10	-2
CAPG	229.63	-0.85	6.37 × 10	-3		FZD8	50.94	-1.86	2.44 × 10	-2
CAPN5	67.7	0.78	6.45 × 10	-2		G3BP1	145.8	0.66	5.36 × 10	-2
CAPRIN2	201.61	0.5	7.07 × 10	-2		GALNT2	97.93	-0.54	2.57 × 10	-2
CAPZA1	1241.72	-0.91	1.06 × 10	-4		GANAB	114.38	0.61	6.63 × 10	-2
CAPZA2	375.61	-0.66	4.82 × 10	-3		GBP1	192.86	0.94	6.90 × 10	-4
CARD11	133.47	0.89	1.67 × 10	-2		GBP5	428.02	1.13	9.33 × 10	-3
CARD16	214.2	-0.81	1.51 × 10	-2		GFOD1	84.87	-0.64	9.44 × 10	-2
CARS	294.48	-0.55	6.60 × 10	-2		GGA2	100.6	0.7	7.30 × 10	-2
CARS2	476.02	-0.62	4.31 × 10	-2		GIMAP5	148.54	0.68	2.77 × 10	-2
CASC4	323.62	-0.54	4.98 × 10	-2		GIMAP7	75.22	0.72	1.31 × 10	-2
CASP1	752.24	-0.61	1.41 × 10	-2		GPR174	59.62	1	9.21 × 10	-2
CAT	929.7	-0.57	6.23 × 10	-2		GRB10	93.45	-1.61	1.41 × 10	-5
CBFA2T2	128.73	0.76	1.93 × 10	-2		GRIK4	60.25	-1.79	1.65 × 10	-3
CBX3	177.2	-0.56	6.24 × 10	-2		GRIN2B	114.58	-1.81	8.08 × 10	-3
CCBL2	102.22	-0.91	2.32 × 10	-2		GZMB	68.95	-1.02	5.65 × 10	-2
CCDC126	66.52	-1	1.22 × 10	-2		HDAC2	80.48	-0.53	9.17 × 10	-2
CCDC141	62.19	1.15	6.59 × 10	-2		HDGFRP3	53.29	-1.81	4.31 × 10	-4
CCDC47	141.58	-0.7	2.13 × 10	-4		HELZ2	303.57	-0.57	6.65 × 10	-2
CCDC50	84.95	0.65	8.20 × 10	-3		HLA-DMA	66.24	0.9	3.05 × 10	-2
CCDC53	54.91	-0.78	7.40 × 10	-4		HLA-DPA1	174.8	0.87	8.42 × 10	-3
CCDC82	183.95	-0.73	4.94 × 10	-2		HLA-DPB1	136.54	0.97	3.60 × 10	-3
CCDC9	88.99	-0.68	2.44 × 10	-2		HLA-DQA1	83.67	1.39	1.22 × 10	-3
CCNH	314.71	-0.76	7.77 × 10	-3		HLA-DRA	727.38	0.81	9.14 × 10	-2
CCNJL	571.47	-0.65	1.63 × 10	-2		HLA-DRB1	210.87	0.97	5.51 × 10	-3
CCNL1	1009.1	-0.83	1.56 × 10	-2		HMCN2	59.09	-1.98	4.82 × 10	-2
CCPG1	931.42	-0.8	8.55 × 10	-4		HMOX2	52.34	0.84	6.69 × 10	-2
CCR1	719.85	-0.71	4.45 × 10	-2		HNRNPUL2	133.25	0.58	8.97 × 10	-2
CCR2	576.77	-0.8	1.03 × 10	-2		HS3ST3B1	54.65	-0.76	8.00 × 10	-3
CCR5	71.06	0.58	9.49 × 10	-2		HSP90AB1	216.46	0.7	8.86 × 10	-2
CD14	859.08	-0.68	7.89 × 10	-3		HSPA1B	68.11	-1.14	6.78 × 10	-2
CD164	766.4	-0.78	4.68 × 10	-3		HYDIN	60.37	-1.49	8.47 × 10	-2
CD2BP2	135.49	-0.6	4.87 × 10	-2		IER5	52.41	0.91	1.41 × 10	-2
CD44	2790.19	-0.89	1.10 × 10	-3		IFIH1	77.42	0.76	5.23 × 10	-2
CD63	372.62	-0.78	8.38 × 10	-3		IFIT1	133.22	1.34	4.32 × 10	-5
CD7	103.18	0.59	2.26 × 10	-2		IFIT2	360.03	1.23	7.29 × 10	-5
CD8A	146.57	0.71	9.51 × 10	-2		IFIT3	269.3	0.81	4.29 × 10	-4
CDADC1	67.4	-1.19	1.98 × 10	-2		IFITM3	314.81	-0.78	4.90 × 10	-2
CDC40	163.96	-0.62	3.23 × 10	-2		IL2RB	109.91	0.66	8.57 × 10	-2
CDC42	2633.03	-0.51	8.45 × 10	-3		IL32	132.56	1.08	1.35 × 10	-2
CDC73	335.63	-0.54	2.31 × 10	-2		INPP4B	99.03	0.97	2.44 × 10	-2
CDIP1	53.72	0.8	4.36 × 10	-2		IRF2BP2	174.97	0.66	6.23 × 10	-2
CDKN1B	355.86	-0.6	1.28 × 10	-2		IRF2BPL	187.25	-0.65	5.09 × 10	-2
CEBPA	196.88	-0.78	7.97 × 10	-3		ITFG2	51.76	0.75	4.67 × 10	-2
CEP135	121.74	-0.5	6.50 × 10	-2		ITGA4	409.71	0.84	2.49 × 10	-2
CFL1	1970.31	-0.67	1.32 × 10	-2		ITGAL	371.69	0.66	2.30 × 10	-2
CFLAR	6619.52	-0.64	7.05 × 10	-2		ITGB1	279.36	0.67	2.18 × 10	-3
CH507-9B2.9	51.03	-0.69	2.36 × 10	-2		ITIH5	51.23	-2.49	8.00 × 10	-3
CHCHD7	68.21	-1.13	3.84 × 10	-3		ITPKB	221.43	0.84	1.46 × 10	-2
CHIC2	137.07	-0.81	2.00 × 10	-2		JDP2	139.71	-0.8	5.93 × 10	-2
CHID1	51.95	0.66	2.88 × 10	-2		KARS	88.84	0.75	2.48 × 10	-2
CHML	72.34	-0.75	8.45 × 10	-2		KAZN	103.46	-0.77	3.08 × 10	-3
CHMP2A	244.14	-0.5	2.04 × 10	-2		KBTBD7	106.35	-0.88	4.25 × 10	-2
CHMP2B	99.04	-0.79	1.82 × 10	-2		KCNB1	56.93	-1.93	3.61 × 10	-2
CHST15	2624.63	-0.55	6.21 × 10	-2		KCNC1	65.08	-1.84	2.45 × 10	-2
CHURC1	309.65	-0.57	3.09 × 10	-2		KCNC4	87.89	-1.05	4.91 × 10	-3
CISH	206.81	-0.59	8.30 × 10	-2		KCNK12	52.37	-1.67	4.99 × 10	-2
CKLF	239.14	-0.99	1.28 × 10	-3		KCNMA1	72.82	-1.62	2.80 × 10	-3
CKLF-CMTM1	89.84	-0.92	4.29 × 10	-2		KCTD7	64.77	0.8	2.97 × 10	-2
CLASP1	525.3	-0.67	4.39 × 10	-3		KDM3A	214.88	0.71	9.11 × 10	-2
CLASRP	150.22	-0.59	5.37 × 10	-2		KIAA0100	163.3	0.57	4.86 × 10	-3
CLCN5	56.25	1.01	8.57 × 10	-2		KIAA1958	52.6	-0.73	2.41 × 10	-2
CLCN7	110.81	0.53	7.17 × 10	-2		KIF2A	115.85	0.65	3.86 × 10	-2
CLEC12A	396.24	-0.65	7.06 × 10	-2		KLF12	133.63	0.93	9.14 × 10	-2
CLEC16A	401.91	0.52	4.11 × 10	-2		KLF9	66.49	-1.18	2.05 × 10	-3
CLEC5A	62.85	-1.9	3.30 × 10	-4		KLRD1	243.76	-0.94	8.29 × 10	-2
CLIC1	1273.55	-0.71	1.91 × 10	-2		LARS	72.36	0.82	2.55 × 10	-2
CLIP1	636.87	-0.67	5.34 × 10	-4		LATS2	92.01	-0.73	1.32 × 10	-3
CLIP2	53.28	0.68	7.31 × 10	-2		LDHB	72.84	0.9	2.44 × 10	-2
CLK1	498.14	-0.64	4.87 × 10	-2		LHFPL2	73.03	-0.78	4.70 × 10	-2
CLK4	288.13	-0.73	1.13 × 10	-2		LIMS1	172.6	-0.57	1.86 × 10	-2
CLN6	57.78	0.7	1.10 × 10	-2		LIPA	88.23	0.82	5.12 × 10	-3
CLPB	111.45	0.54	6.64 × 10	-2		LRFN1	61.03	-0.64	4.24 × 10	-2
CLSTN1	128.8	0.54	7.77 × 10	-2		LRMP	223.32	1.18	1.74 × 10	-4
CLU	321.28	0.61	9.47 × 10	-2		LTB	116.13	0.9	7.54 × 10	-2
CLUH	51.21	1.07	6.68 × 10	-3		LUC7L3	187.95	0.67	5.25 × 10	-3
CMTM2	194.37	-0.87	1.49 × 10	-3		LY75	99.95	0.63	1.52 × 10	-2
CMTM6	1087.1	-0.68	2.21 × 10	-2		MAEA	232.11	-0.55	3.69 × 10	-2
CNEP1R1	158.71	-0.52	5.40 × 10	-2		MAGI2	66.95	-1.58	7.64 × 10	-2
CNN2	2065.68	-0.5	5.53 × 10	-2		MAML2	172.33	0.86	5.78 × 10	-4
CNNM2	86.54	1.01	1.21 × 10	-2		MAN2A1	137.23	0.59	4.66 × 10	-3
COBLL1	68.25	0.65	7.31 × 10	-2		MAN2A2	435.81	-0.73	4.25 × 10	-2
COG2	88.66	0.53	6.58 × 10	-2		MAPK1IP1L	151.22	-0.56	3.31 × 10	-2
COX7A2L	114.76	-0.58	4.68 × 10	-2		MATR3	252.35	0.77	1.89 × 10	-4
CPNE2	130.24	-0.66	6.65 × 10	-2		MDFIC	73.85	0.71	5.31 × 10	-2
CRAT	65.82	0.59	4.84 × 10	-2		METTL14	50.5	0.84	1.60 × 10	-2
CRY2	80.05	0.5	6.14 × 10	-2		MOB3C	112.85	-0.62	5.86 × 10	-2
CSAD	114.78	-0.55	9.51 × 10	-2		MPEG1	845.22	0.68	9.02 × 10	-2
CSF1	51.1	0.61	6.84 × 10	-2		MPPE1	133.75	0.55	8.73 × 10	-2
CSF2RA	589.01	-0.53	6.15 × 10	-2		MS4A1	69.02	1.23	9.53 × 10	-3
CSF3R	13223.7	-0.66	4.46 × 10	-2		MS4A7	135.85	0.78	2.26 × 10	-2
CSTA	120.73	-0.75	6.14 × 10	-2		MTR	95.56	0.81	3.30 × 10	-2
CTAGE5	215.52	-0.54	5.31 × 10	-2		MUC12	173.54	-1.7	1.62 × 10	-2
CTB-133G6.1	92.29	0.69	3.83 × 10	-2		MUC17	74.44	-2.5	1.19 × 10	-2
CTB-50L17.14	58.41	-1.25	1.37 × 10	-2		MUC3A	359.06	-1.36	5.11 × 10	-2
CTBS	445.65	-0.77	2.08 × 10	-2		MUC4	105.31	-1.65	3.31 × 10	-2
CTD-3088G3.8	267.3	0.57	4.83 × 10	-2		MUC5AC	84.64	-1.52	2.83 × 10	-2
CTD-3214H19.16	73.63	-1.47	7.95 × 10	-2		MYL4	73.81	0.62	7.81 × 10	-2
CTDSP1	615.4	-0.56	2.30 × 10	-2		MYOF	70.59	0.89	4.53 × 10	-2
CTDSPL	57.31	1.14	1.19 × 10	-2		NAGK	291.75	0.55	6.08 × 10	-2
CTNND1	113.39	0.77	1.04 × 10	-2		NAP1L1	251.33	0.8	5.99 × 10	-3
CTSH	298.02	-0.58	3.14 × 10	-2		NAP1L4	182.29	0.55	1.55 × 10	-2
CTTN	64.55	0.79	3.15 × 10	-2		NBEAL2	1054.12	-0.64	4.85 × 10	-2
CUL4B	339.72	-0.55	2.64 × 10	-2		NBPF19	81.24	0.87	6.06 × 10	-2
CWF19L1	128.56	-0.51	9.36 × 10	-2		NCKAP5L	72.5	-0.63	4.34 × 10	-2
CXCR2	5170.24	-0.58	8.59 × 10	-2		NCL	163.9	0.82	6.71 × 10	-3
CXorf23	152.74	-0.76	1.81 × 10	-2		NCLN	65.66	-0.52	8.45 × 10	-2
CYBB	1903.78	-0.61	2.20 × 10	-2		NDUFA10	104.31	0.57	1.11 × 10	-2
CYP4V2	84.51	0.55	8.94 × 10	-2		NFATC3	326.04	0.58	4.42 × 10	-3
DAAM1	54.72	0.86	2.28 × 10	-2		NFX1	86.93	0.56	7.26 × 10	-2
DAPK1	199.1	0.63	9.62 × 10	-4		NHSL2	749.61	0.53	8.31 × 10	-2
DAPK2	383.76	-0.63	5.17 × 10	-2		NKG7	78.58	-0.72	9.23 × 10	-2
DBNL	1228.57	-0.75	5.35 × 10	-3		NLRP3	94.71	-0.58	9.88 × 10	-2
DCAF12	8514.63	0.57	8.21 × 10	-2		NOSIP	80.43	0.6	2.47 × 10	-2
DCAF17	57.64	0.54	1.88 × 10	-2		NPM1	111.2	0.94	2.77 × 10	-2
DCUN1D3	85.14	-0.66	7.29 × 10	-2		NTRK3	78.15	-2.05	5.22 × 10	-2
DDAH2	57.68	-0.89	1.60 × 10	-2		NUP43	50.82	0.92	3.89 × 10	-2
DDB2	64.14	0.69	3.30 × 10	-3		OGFRL1	636.88	0.62	6.67 × 10	-2
DDX10	53.1	0.97	1.99 × 10	-2		OSBPL3	61.04	0.98	5.05 × 10	-2
DDX19A	68.36	0.69	8.52 × 10	-2		OTUD7A	78.53	-1.07	9.17 × 10	-2
DDX41	71.56	-0.52	9.88 × 10	-2		OXNAD1	61.88	0.86	9.16 × 10	-3
DDX54	70.31	0.64	3.57 × 10	-2		PA2G4	191.76	0.52	1.92 × 10	-2
DDX59	129.45	-0.51	8.56 × 10	-2		PABPC4	109.62	0.85	4.82 × 10	-2
DDX60L	1547.71	-0.75	4.45 × 10	-3		PAM	109.59	-1.1	1.87 × 10	-5
DEFA1	386.38	0.94	1.77 × 10	-2		PANX2	68.62	-0.83	3.90 × 10	-2
DHX57	82.32	0.56	8.52 × 10	-2		PARP12	100.02	0.74	4.61 × 10	-2
DIAPH2	176.4	-0.56	6.65 × 10	-2		PARP15	67.53	0.64	5.18 × 10	-2
DIEXF	61.51	0.62	6.94 × 10	-2		PAXBP1	56.94	0.75	9.85 × 10	-4
DIS3L	62.44	0.64	1.79 × 10	-2		PCNP	82.07	0.6	4.03 × 10	-2
DLD	140.01	-0.77	1.26 × 10	-3		PCNT	110.32	0.71	6.67 × 10	-2
DMTN	4954.14	0.61	9.88 × 10	-2		PCSK7	282.63	0.56	6.15 × 10	-2
DNAJA1	212.76	-0.55	4.20 × 10	-2		PDE4B	187.79	0.53	9.28 × 10	-2
DNAJA4	189.13	0.52	4.91 × 10	-2		PDE4D	100.98	-0.8	1.82 × 10	-2
DNAJB11	76.11	-0.51	2.23 × 10	-2		PECAM1	943.98	0.67	3.22 × 10	-2
DNAJC3	597.13	-0.55	3.94 × 10	-2		PHACTR2	133.8	-0.56	2.51 × 10	-2
DNAJC5	663.2	-0.61	1.78 × 10	-2		PIGB	61	0.83	4.25 × 10	-2
DNAJC6	112.32	0.82	4.36 × 10	-2		PKN2	302.23	0.68	2.24 × 10	-2
DNASE2	70.16	0.76	4.85 × 10	-2		PKNOX1	74.91	-0.74	2.71 × 10	-2
DNHD1	79.67	0.66	2.56 × 10	-2		PLEKHG2	54.32	-0.72	8.04 × 10	-2
DNMT1	165.85	0.69	4.60 × 10	-2		PLEKHG3	445.23	0.65	3.92 × 10	-2
DNPEP	53.69	1.09	3.59 × 10	-3		PLOD1	66.63	-0.65	6.76 × 10	-2
DNTTIP1	133.93	-0.63	8.73 × 10	-3		POLH	57.55	0.99	8.43 × 10	-2
DNTTIP2	118.32	-0.5	9.07 × 10	-2		POLL	95.78	0.64	4.39 × 10	-2
DPYD	1149	-0.87	8.63 × 10	-3		POLR2A	385.76	0.52	3.72 × 10	-3
DRAM2	86.1	-0.56	2.09 × 10	-2		POU2F2	160.52	0.63	2.55 × 10	-2
DST	84.02	0.77	9.62 × 10	-2		POU3F3	52.52	-1.95	3.64 × 10	-2
DTNBP1	82.86	-0.7	2.89 × 10	-2		POU5F2	52.94	-0.71	8.29 × 10	-2
DYNLT1	315.58	-0.81	1.10 × 10	-2		PPCDC	54.11	0.72	9.83 × 10	-2
DYRK1B	87.17	0.73	2.20 × 10	-2		PPP1CC	149.28	0.81	7.05 × 10	-4
DYRK2	260.49	0.52	8.89 × 10	-2		PPP1R3E	54.73	1.04	3.03 × 10	-3
E4F1	51.72	0.79	9.05 × 10	-3		PPP1R9B	308.59	0.79	1.64 × 10	-2
EBLN2	59.79	-1.19	1.04 × 10	-2		PPTC7	153.19	0.83	3.72 × 10	-3
ECHDC2	67.76	0.52	3.23 × 10	-2		PRDM8	55.51	-0.58	5.83 × 10	-2
ECSIT	55.21	0.6	5.30 × 10	-2		PRKACB	85.26	0.8	1.23 × 10	-2
EDC4	106.48	0.59	3.54 × 10	-2		PRKX	96.67	0.7	4.52 × 10	-2
EEF2K	64.39	0.83	6.72 × 10	-2		PTAFR	544.6	0.6	2.99 × 10	-2
EHD3	63.97	0.71	2.23 × 10	-2		PTCD3	80.12	0.79	4.25 × 10	-2
EHMT2	62.66	0.72	3.70 × 10	-2		PTMA	375.19	0.68	5.90 × 10	-3
EIF2D	72.18	0.61	4.85 × 10	-2		PXYLP1	63.57	-0.83	6.14 × 10	-2
ELF2	711.85	-0.57	6.96 × 10	-2		RAB11FIP1	729.77	0.78	7.77 × 10	-3
ELK4	631.46	0.65	3.14 × 10	-2		RAB11FIP4	196.24	0.88	4.83 × 10	-2
ELMOD2	69.02	-0.65	8.83 × 10	-2		RAB24	147.26	-0.78	3.56 × 10	-2
EMC2	72.38	-0.68	1.73 × 10	-2		RAB5A	158.68	-0.69	3.81 × 10	-2
EML4	611.22	-0.57	9.83 × 10	-4		RAD50	62.6	0.67	2.16 × 10	-2
ENDOD1	144.58	0.61	7.23 × 10	-2		RASA3	161.09	0.79	4.93 × 10	-2
ENTPD4	526.29	-0.52	6.49 × 10	-3		RBM14	80.53	0.74	6.06 × 10	-2
ENTPD5	82.01	0.64	6.34 × 10	-2		RCBTB2	85.5	0.65	2.12 × 10	-2
ENY2	79.47	-0.64	1.98 × 10	-3		REPIN1	74.15	0.79	4.58 × 10	-3
EP400NL	73.45	0.62	6.67 × 10	-3		RMND5A	355.99	0.52	2.42 × 10	-3
EPB42	685.34	0.8	1.22 × 10	-2		RNASEH2B	115.32	0.71	1.59 × 10	-2
EPC2	246.92	-0.55	6.50 × 10	-2		RNF144B	240.61	-0.62	6.36 × 10	-2
ERGIC2	149.03	-1.14	6.21 × 10	-4		RNF165	54.38	-0.96	5.25 × 10	-2
ERICH1	495.44	-0.68	2.74 × 10	-3		RPAP3	50.43	1.14	3.58 × 10	-2
ESPN	114.49	0.89	1.34 × 10	-2		RPL11	176.03	0.85	3.63 × 10	-3
ETV6	855.47	-0.75	1.09 × 10	-2		RPL14	339.32	0.93	3.52 × 10	-2
EVI5	157.35	-0.61	7.60 × 10	-2		RPL17	150.38	0.82	3.67 × 10	-2
EXOC1	223.27	-0.62	1.90 × 10	-2		RPL22	106.63	1.02	4.57 × 10	-4
EXOC5	128	-0.73	9.29 × 10	-3		RPL23	168.85	0.9	1.78 × 10	-2
FAF2	167.04	-0.5	1.95 × 10	-2		RPL26	111.58	0.64	9.71 × 10	-2
FAM104A	1003.66	0.6	5.67 × 10	-2		RPL3	527.83	0.65	4.25 × 10	-2
FAM105A	216.69	-1.44	6.53 × 10	-4		RPL31	154	0.91	8.15 × 10	-2
FAM117B	114.22	0.75	9.11 × 10	-3		RPL34	109.89	1.05	1.73 × 10	-2
FAM129A	3156.9	-0.56	7.38 × 10	-2		RPL35A	144.56	0.61	5.16 × 10	-2
FAM129C	63.23	0.8	1.95 × 10	-2		RPL41	423.7	0.78	8.99 × 10	-2
FAM160A2	285.13	-0.66	4.95 × 10	-2		RPL7	233.17	0.85	4.40 × 10	-2
FAM177A1	94.26	-0.82	1.98 × 10	-2		RPP14	176.27	-1.11	9.98 × 10	-2
FAM198B	303.88	-1.07	1.11 × 10	-4		RPS17	185.13	0.82	3.96 × 10	-2
FAM208A	418.25	-0.6	1.86 × 10	-2		RPS23	188.17	0.81	2.92 × 10	-2
FAM20B	150.74	0.67	5.55 × 10	-3		RPS24	177.89	0.74	9.81 × 10	-2
FAM228B	85.54	-0.7	2.01 × 10	-2		RPS27	220.37	0.94	1.35 × 10	-2
FAM45A	304.06	-0.7	6.26 × 10	-3		RPS3	340.44	0.79	5.36 × 10	-2
FAM46C	7310.27	0.59	8.72 × 10	-2		RPS6KA5	280.28	0.85	6.15 × 10	-2
FAM49B	1231.91	-0.7	1.09 × 10	-2		RPS7	155.07	0.78	5.37 × 10	-2
FAM8A1	560.91	-0.53	4.43 × 10	-2		RPS8	294.57	0.68	7.81 × 10	-2
FANCA	71.94	1.04	1.79 × 10	-5		RPSA	247.03	0.77	4.34 × 10	-2
FAR1	616.66	-0.68	5.36 × 10	-3		RQCD1	67.43	0.7	7.76 × 10	-3
FARP2	75.51	0.57	7.01 × 10	-2		RRBP1	128.82	-0.87	1.39 × 10	-2
FBXL13	69.35	-0.72	6.35 × 10	-2		RSL1D1	84.12	0.89	4.82 × 10	-4
FBXO11	467.47	-0.55	4.67 × 10	-2		RUNDC1	63.86	0.67	2.27 × 10	-2
FBXO3	179.92	-0.66	1.42 × 10	-3		RYR3	74.28	-2.31	1.59 × 10	-2
FBXO30	145.95	-0.58	6.98 × 10	-2		SALL3	55.76	-2.18	6.29 × 10	-4
FBXO32	55.96	0.6	8.39 × 10	-2		SAMHD1	663.55	0.59	2.21 × 10	-3
FBXO33	153.92	-0.54	2.70 × 10	-2		SCLT1	216.72	0.93	3.18 × 10	-5
FBXO38	490.98	-0.54	4.44 × 10	-2		SDK1	51.62	-1.8	3.02 × 10	-2
FBXO41	57.67	0.67	9.43 × 10	-2		38596	58.88	-1.25	1.46 × 10	-4
FCGR1A	585.66	-1.42	1.10 × 10	-2		SERBP1	157.3	0.53	7.90 × 10	-2
FCGR1B	704.1	-1.61	1.01 × 10	-3		SERINC5	173.87	0.64	4.12 × 10	-3
FCGR2A	6764.6	-0.66	3.23 × 10	-2		SESN3	717.02	0.54	4.52 × 10	-2
FCGR2B	200.68	0.52	5.33 × 10	-2		SET	219.43	0.65	9.96 × 10	-2
FCRL1	141.92	-1.15	7.04 × 10	-2		SETD8	61.26	-0.56	5.07 × 10	-2
FECH	1148.67	0.83	1.67 × 10	-2		SGK1	144.27	1.02	4.82 × 10	-4
FERMT3	547.99	-0.54	5.64 × 10	-2		SGMS2	69.11	-0.71	2.84 × 10	-2
FFAR2	995.93	-0.85	4.71 × 10	-2		SHANK2	61.22	-1.6	5.05 × 10	-2
FHL1	62.53	0.99	1.43 × 10	-2		SLC38A5	189.65	0.66	3.35 × 10	-2
FKBP1A	787.89	-0.67	1.79 × 10	-2		SLC39A10	58.49	0.88	2.96 × 10	-2
FLCN	201.58	0.51	1.02 × 10	-2		SLC44A1	102.51	-0.82	6.55 × 10	-3
FLT3LG	68.97	1	9.90 × 10	-3		SLC5A3	87.56	0.88	4.71 × 10	-2
FOLR3	174.26	-0.9	6.51 × 10	-3		SLC7A6	94.06	0.96	2.27 × 10	-2
FOXO4	828.11	0.54	6.23 × 10	-2		SLC7A6OS	56.84	0.76	1.74 × 10	-2
FPR1	3513.26	-0.89	1.24 × 10	-2		SMAP2	1259.34	-0.7	4.93 × 10	-2
FRMD4A	159.91	0.83	1.72 × 10	-2		SMC3	65.56	0.86	2.66 × 10	-2
FTO	101.93	0.76	7.67 × 10	-3		SND1	128.52	0.54	6.02 × 10	-2
GAB2	1399.04	-0.69	3.95 × 10	-2		SNTB2	120.67	-0.89	7.34 × 10	-3
GABARAPL1	350.26	-0.5	4.69 × 10	-2		SNX1	254.09	-0.61	9.13 × 10	-2
GALNT1	155.14	-0.71	4.04 × 10	-4		SORT1	371.87	-1.53	9.94 × 10	-4
GALNT4	105.03	-0.78	3.82 × 10	-2		SPEN	486.16	0.54	1.08 × 10	-2
GALNT6	86.01	0.66	6.82 × 10	-2		SPTBN1	211.7	0.63	1.12 × 10	-3
GALNT7	156.45	-0.51	2.19 × 10	-2		SRA1	65.23	-0.68	7.32 × 10	-2
GALT	75.47	0.71	8.97 × 10	-4		SRGAP1	80.43	-2.57	8.98 × 10	-8
GAS2L1	52.02	0.7	3.95 × 10	-2		SRSF6	146.94	0.54	5.45 × 10	-2
GAS7	1109.25	-0.78	7.87 × 10	-2		SRSF7	82.77	0.66	1.42 × 10	-2
GATA1	120.67	0.85	1.62 × 10	-2		SRSF8	101.29	0.57	6.51 × 10	-2
GATA2	51.27	1.18	6.04 × 10	-3		SSBP2	72.63	0.67	8.54 × 10	-2
GATA3	62.96	0.94	5.00 × 10	-2		ST3GAL6	54.13	0.92	4.52 × 10	-2
GBE1	117.99	-0.62	5.51 × 10	-2		STIL	115.72	0.56	6.09 × 10	-2
GCLC	182.5	0.59	2.65 × 10	-3		STX16-NPEPL1	50.04	-0.6	8.03 × 10	-2
GCLM	88.23	-0.8	3.44 × 10	-2		SUMF2	57.51	0.81	1.48 × 10	-2
GCNT1	98	-0.64	7.43 × 10	-2		SUPT5H	93.03	0.56	6.97 × 10	-2
GDPD5	75.85	0.83	3.40 × 10	-2		SYAP1	94.92	-0.85	3.84 × 10	-3
GFI1B	82.01	0.8	2.13 × 10	-2		TAF8	133.31	-0.69	3.05 × 10	-2
GGT1	58.52	-0.8	8.03 × 10	-2		TAP2	189.03	0.7	2.52 × 10	-2
GID4	111.41	1.14	3.92 × 10	-2		TBC1D4	50.26	1.27	1.08 × 10	-3
GLCCI1	226.11	-0.74	2.11 × 10	-3		TBKBP1	63.68	-0.64	9.44 × 10	-2
GLIPR2	828.39	-0.76	1.71 × 10	-3		TC2N	110.69	1.02	1.80 × 10	-2
GLOD4	70.54	0.63	9.55 × 10	-2		TCF20	259.11	0.59	7.93 × 10	-2
GLT1D1	769.85	-0.68	3.25 × 10	-2		TESPA1	82.98	1.2	3.93 × 10	-3
GLTP	173.97	-0.51	6.96 × 10	-2		TGFBI	171.38	0.59	9.06 × 10	-2
GMCL1	112.39	-0.52	5.83 × 10	-2		THBD	137.32	-0.8	2.65 × 10	-3
GMFB	112.38	-0.86	6.20 × 10	-2		THBS1	215.35	-1.64	5.90 × 10	-3
GMFG	506.81	-0.9	4.79 × 10	-3		THEMIS	55.58	0.92	9.96 × 10	-2
GMPR	661.62	0.73	2.92 × 10	-2		THUMPD1	77.87	0.54	9.82 × 10	-2
GMPR2	183.96	-0.54	3.49 × 10	-2		TIMM10B	55.81	0.63	2.44 × 10	-2
GNAI3	678.68	-0.69	9.44 × 10	-3		TMEM185B	143.76	-0.79	2.94 × 10	-2
GNAZ	72.77	0.85	1.71 × 10	-2		TMEM56	156.23	0.72	9.96 × 10	-2
GNB5	83.92	0.66	7.38 × 10	-2		TMOD2	127.14	1.12	2.04 × 10	-4
GOLGA3	256.52	0.64	7.95 × 10	-3		TMTC1	67.31	-1.12	1.36 × 10	-5
GOLGA8B	200.56	0.61	4.68 × 10	-2		TNFAIP2	661.16	1.11	3.50 × 10	-5
GPBAR1	63.76	0.69	5.47 × 10	-2		TNFAIP3	157.65	-0.63	4.04 × 10	-2
GPCPD1	965.37	-0.79	1.73 × 10	-3		TP53	62.11	0.54	6.31 × 10	-2
GPI	180.2	0.5	2.11 × 10	-2		TPM4	465.77	-0.64	9.75 × 10	-3
GPR146	176.7	0.75	1.33 × 10	-2		TRERF1	103.37	1.14	5.91 × 10	-3
GPR65	265.59	-0.63	1.48 × 10	-2		TRIM24	89.52	0.8	1.08 × 10	-2
GPR84	80.26	-3.17	1.86 × 10	-5		TSHZ3	88.1	-0.66	6.78 × 10	-2
GRAP2	334.57	0.53	6.82 × 10	-2		UBA2	62.19	0.79	1.46 × 10	-2
GRK6	982.9	-0.56	2.93 × 10	-2		UBE2G2	104.7	0.7	9.54 × 10	-3
GSE1	375.22	0.8	4.87 × 10	-6		UBTF	143.13	0.78	1.24 × 10	-2
GTF2A2	53.82	-0.54	6.45 × 10	-2		UHRF2	98.99	0.51	7.77 × 10	-2
GTF2B	69.99	-0.54	5.14 × 10	-2		VPRBP	54.86	0.7	1.09 × 10	-2
GTF2IRD2	65.21	-0.67	7.31 × 10	-2		VPS13C	478.03	0.63	5.31 × 10	-3
GUCD1	1131.17	0.54	5.83 × 10	-2		VPS41	130.72	0.56	1.14 × 10	-2
GYS1	125.44	-0.57	8.70 × 10	-2		VPS9D1	52.8	-1.3	2.63 × 10	-2
HBM	263.91	0.61	7.54 × 10	-2		WDR37	114.86	-0.51	8.00 × 10	-2
HCG27	767.99	-0.55	9.04 × 10	-2		WDR6	54.45	0.66	9.20 × 10	-2
HCK	1738.6	-0.73	3.55 × 10	-2		WIPI1	99.49	-0.61	5.52 × 10	-2
HCLS1	1686.4	-0.78	4.00 × 10	-3		WTIP	50.16	-1.27	8.46 × 10	-2
HDAC6	95.71	0.52	3.37 × 10	-2		WWP1	78.75	0.81	7.94 × 10	-3
HEG1	117.16	0.94	5.97 × 10	-2		XAF1	221.87	0.63	5.85 × 10	-2
HELB	548.83	-1.14	2.13 × 10	-4		XPC	74.19	0.61	5.65 × 10	-2
HELZ	1025.59	-0.51	7.05 × 10	-3		XRCC6	129.11	0.66	3.83 × 10	-2
HERC4	433.61	-0.64	1.71 × 10	-3		ZBTB16	152.43	-2.29	6.20 × 10	-5
HIAT1	179	-0.87	1.28 × 10	-2		ZC3H3	85.35	-0.8	3.42 × 10	-3
HIATL2	341.44	-0.73	5.44 × 10	-3		ZCCHC2	268.04	0.67	5.01 × 10	-3
HIST1H2AC	861.08	-0.56	7.34 × 10	-2		ZFP36L2	549.42	0.65	8.95 × 10	-2
HIST1H3H	123.2	0.68	6.28 × 10	-3		ZKSCAN8	62.11	0.61	9.04 × 10	-2
HIST2H4B	61.87	-1.85	7.96 × 10	-3		ZMIZ1	243.35	0.62	4.38 × 10	-2
HIVEP3	145.33	0.74	1.85 × 10	-2		ZNF117	222.85	0.55	9.08 × 10	-2
HN1	257.65	-0.63	5.74 × 10	-2		ZNF230	53.64	-0.84	2.63 × 10	-4
HNRNPH2	253.8	-0.82	6.49 × 10	-3		ZNF236	81.25	0.6	8.74 × 10	-2
HOOK3	395.73	-0.58	7.38 × 10	-2		ZNF276	224.2	-0.76	3.43 × 10	-2
HPS4	87.73	0.58	7.77 × 10	-2		ZNF467	251.09	-0.86	4.78 × 10	-4
HSBP1	112.21	-0.74	2.85 × 10	-2
HSD17B12	106.14	-0.65	8.61 × 10	-2
HSDL2	253.68	-0.81	9.70 × 10	-3
HSPA1A	1136.26	-0.61	5.28 × 10	-2
HTATIP2	129.74	-0.71	5.59 × 10	-3
IER3	82.77	-1.01	1.19 × 10	-2
IFFO2	71.12	0.71	9.63 × 10	-2
IFI27	78.36	0.8	4.39 × 10	-2
IFITM1	801.06	-0.84	2.01 × 10	-2
IFNGR2	1218.46	-0.55	5.36 × 10	-2
IFRD1	523.32	-0.78	5.22 × 10	-3
IGF2BP2	610.57	0.73	3.32 × 10	-2
IL10RB	512.16	-0.8	8.26 × 10	-3
IL1B	372.58	-0.74	6.43 × 10	-2
IL1RN	409.23	-0.83	2.86 × 10	-2
IL21R	62.67	0.55	5.58 × 10	-2
IL6ST	522.13	-0.76	1.10 × 10	-3
IMPDH1	512.78	-0.56	4.13 × 10	-2
INF2	72.81	0.52	9.32 × 10	-2
INSIG2	53.35	-0.67	6.96 × 10	-2
IPMK	418.56	-0.62	6.74 × 10	-2
IPO5	130.95	0.76	3.64 × 10	-3
IQCE	99.84	0.59	3.32 × 10	-2
IQGAP1	4299.11	-0.59	6.21 × 10	-2
IRAK4	314.68	-0.73	1.44 × 10	-2
ISCA1	197.58	0.66	4.20 × 10	-2
ITGA1	72.05	-0.91	3.01 × 10	-2
ITGA2B	163.95	0.88	7.92 × 10	-4
ITGB5	57.97	0.69	4.35 × 10	-2
ITPK1	630.62	0.51	4.71 × 10	-2
ITPKC	61.58	-0.87	8.06 × 10	-2
ITPR3	104.48	0.71	3.07 × 10	-2
JAK2	727	-0.97	1.47 × 10	-3
JARID2	565.55	0.53	7.08 × 10	-2
JAZF1	538.47	0.65	3.92 × 10	-2
JMJD6	160.11	-1.14	3.98 × 10	-3
KANK2	92.61	1.16	1.38 × 10	-5
KBTBD2	398.36	-0.74	6.18 × 10	-4
KCNA3	136.16	0.61	6.23 × 10	-2
KCNJ2	830.48	-0.69	5.10 × 10	-2
KDM1A	85.29	0.6	6.15 × 10	-2
KDM2B	105.9	0.91	2.96 × 10	-4
KDM7A	1084.49	-0.65	5.37 × 10	-2
KEL	55.94	0.9	3.90 × 10	-2
KIAA0368	275.3	-0.53	3.85 × 10	-2
KIAA0825	186.37	-0.63	9.56 × 10	-2
KIAA1033	763.87	-0.6	2.89 × 10	-2
KIAA1109	1769.54	-0.53	8.53 × 10	-2
KIAA1468	394.27	-0.58	3.93 × 10	-3
KIDINS220	931.78	-0.64	7.62 × 10	-3
KIF22	55.27	0.65	9.55 × 10	-2
KIF5B	511.01	-0.69	3.01 × 10	-2
KLF1	131.15	0.69	5.64 × 10	-2
KLF10	89.28	0.5	8.94 × 10	-2
KLF7	722.37	-0.62	4.04 × 10	-2
KLHDC4	99	0.58	5.16 × 10	-2
KLHL15	74.46	-1.13	3.22 × 10	-3
KLHL8	196.25	-0.75	2.86 × 10	-2
KLHL9	200.99	-0.58	3.14 × 10	-2
KLRG1	68.03	0.69	5.11 × 10	-2
KNTC1	105.05	0.57	6.22 × 10	-2
KPNA4	571.39	-0.61	3.98 × 10	-3
KRAS	258.91	-0.62	8.34 × 10	-2
KRT1	614.87	0.73	1.71 × 10	-2
L3MBTL2	58.23	0.91	7.97 × 10	-4
LACTB	129.66	-0.71	1.42 × 10	-2
LAMTOR3	103.09	-0.71	5.40 × 10	-2
LAT	99.98	0.66	6.01 × 10	-2
LAT2	613.6	-0.65	2.89 × 10	-2
LAX1	52.99	0.82	1.03 × 10	-2
LCK	154.63	0.92	1.33 × 10	-2
LCP1	9231.6	-0.58	1.37 × 10	-2
LDOC1L	51.1	0.67	1.79 × 10	-2
LETM1	69.41	0.67	1.67 × 10	-2
LGALS3	668.74	0.5	6.70 × 10	-2
LHPP	58.21	0.52	4.31 × 10	-2
LIG4	81.7	-0.92	8.38 × 10	-3
LIN7A	421.93	-1.17	1.06 × 10	-4
LIPN	68.16	-1.55	9.68 × 10	-3
LMBRD1	411.4	-0.68	4.22 × 10	-3
LONP1	51.74	0.64	2.88 × 10	-2
LOXHD1	88.39	-1.25	5.28 × 10	-2
LPCAT2	597.18	-0.59	8.39 × 10	-2
LPCAT3	232.5	-0.8	2.92 × 10	-2
LPGAT1	1156.49	-0.58	4.80 × 10	-2
LPIN1	161.62	0.56	1.77 × 10	-2
LPPR2	313.33	-0.6	9.10 × 10	-2
LRPAP1	346.79	-0.58	2.79 × 10	-2
LRPPRC	150.76	0.66	4.58 × 10	-2
LRRC8D	131.8	0.53	5.29 × 10	-2
LTA4H	747.67	-0.63	9.14 × 10	-3
LTBP1	99.98	0.89	2.05 × 10	-2
LYST	4659.5	-0.51	6.74 × 10	-2
LYZ	6488.3	-0.52	1.21 × 10	-2
MADD	215.07	0.57	9.41 × 10	-4
MAN1C1	61.23	0.95	3.43 × 10	-2
MAP3K1	1328.69	-0.56	2.75 × 10	-2
MAP3K7CL	100.38	0.68	2.66 × 10	-2
MAP4K4	1449.48	-0.69	1.02 × 10	-2
MAPK13	429.82	-0.75	5.90 × 10	-2
MAPRE1	348.48	-0.6	3.21 × 10	-4
MARCH5	110.05	-0.84	1.85 × 10	-2
MARCH7	922.05	-0.66	3.84 × 10	-2
MARCH8	3787.26	0.63	2.46 × 10	-2
MBD2	526.96	-0.57	5.07 × 10	-2
MBD3	69.17	0.63	1.79 × 10	-3
MBOAT1	216.44	-0.83	6.68 × 10	-3
MCMBP	393.81	-0.68	6.05 × 10	-3
MCTP1	350.51	-0.85	7.30 × 10	-3
MCTS1	95.38	-0.72	2.08 × 10	-2
MDM4	1205.42	-0.53	9.86 × 10	-3
ME2	499.31	-0.7	8.89 × 10	-4
MED25	527.84	0.64	8.40 × 10	-4
MEGF6	151.39	-0.72	4.24 × 10	-2
MEGF9	3393.06	-0.81	2.56 × 10	-2
MFHAS1	111.86	0.95	9.65 × 10	-3
MGAT4A	345.28	-0.56	5.28 × 10	-2
MGAT5	199.75	0.61	2.11 × 10	-2
MGLL	60.05	0.79	4.90 × 10	-2
MGST1	50.75	-0.58	4.70 × 10	-2
MIB2	57.4	0.65	6.18 × 10	-2
MICAL1	470.83	-0.54	8.75 × 10	-2
MICU1	173.78	-0.52	5.81 × 10	-2
MIER1	354.5	-0.62	1.86 × 10	-2
MKI67	131.45	0.72	4.14 × 10	-2
MKL2	72.36	0.81	7.87 × 10	-2
MLF2	330.5	-0.55	2.32 × 10	-2
MLLT4	108.96	-0.73	2.42 × 10	-2
MMADHC	181.04	-0.78	1.42 × 10	-2
MME	2369.51	-1.05	1.87 × 10	-3
MMS19	84.2	0.65	1.32 × 10	-2
MNDA	6839.74	-0.77	1.29 × 10	-3
MOB1B	140.04	0.5	3.39 × 10	-2
MON2	508.09	-0.6	4.53 × 10	-2
MOSPD2	320.53	-0.74	8.70 × 10	-3
MPRIP	437.23	0.59	1.83 × 10	-2
MPZL1	315.18	0.52	9.49 × 10	-2
MRC2	102.72	0.83	3.32 × 10	-3
MRVI1	448.75	-0.98	4.12 × 10	-3
MS4A6A	619.29	-0.57	5.98 × 10	-2
MT2A	119.95	0.81	7.65 × 10	-3
MTF1	461.4	-0.71	3.83 × 10	-2
MTHFD1	60.65	1.04	4.76 × 10	-3
MTIF3	68.23	-0.5	5.91 × 10	-2
MTMR1	260.18	-0.57	4.67 × 10	-2
MTMR10	705.58	-0.63	1.06 × 10	-2
MTMR6	266.11	-0.74	1.84 × 10	-2
MTSS1	176.83	0.67	1.73 × 10	-3
MXD4	322.6	0.6	5.79 × 10	-3
MXI1	1676.77	0.56	6.70 × 10	-2
MYL12A	1455.23	-0.54	2.05 × 10	-2
MYL6	1075.22	-0.53	2.89 × 10	-2
MYL9	163.99	0.85	1.78 × 10	-2
N4BP1	973.39	-0.64	2.99 × 10	-3
N4BP2L1	95.4	0.53	1.89 × 10	-2
N4BP2L2	1299.2	-0.55	5.02 × 10	-2
NANS	71.38	-0.9	4.04 × 10	-3
NAV1	52.06	0.88	9.08 × 10	-2
NBN	323.6	-0.77	4.60 × 10	-2
NCAPD3	77	0.82	2.83 × 10	-2
NCOA1	1407.24	-0.53	7.79 × 10	-2
NDUFAF7	70.2	-1.03	2.28 × 10	-3
NEDD4L	89.71	0.9	1.67 × 10	-2
NEK6	456.64	-0.51	5.79 × 10	-3
NEK9	281.12	-0.55	2.06 × 10	-2
NELL2	78.55	0.95	7.25 × 10	-2
NEMF	231.82	-0.59	4.28 × 10	-2
NEURL4	50.79	0.63	3.52 × 10	-2
NFATC2	283.68	0.76	2.76 × 10	-2
NFE2	1984.23	-0.73	4.19 × 10	-2
NFIX	874.47	0.73	4.52 × 10	-2
NFKB1	387.53	-0.51	1.09 × 10	-2
NGLY1	193.69	-0.63	1.36 × 10	-2
NIN	1966.96	-0.58	8.93 × 10	-3
NLRC3	175.95	0.61	5.69 × 10	-2
NLRP12	831.33	-0.86	8.68 × 10	-4
NMI	338.66	-0.58	9.89 × 10	-3
NMRK1	70.26	-0.56	2.66 × 10	-2
NOD1	68.27	0.81	1.18 × 10	-2
NOL4L	280.21	0.55	1.45 × 10	-2
NOM1	63.6	0.69	6.54 × 10	-2
NOMO2	145.75	0.65	6.60 × 10	-2
NPIPA1	68.6	1.06	5.20 × 10	-2
NPL	561.22	-0.57	2.47 × 10	-2
NPRL3	858.31	0.83	1.00 × 10	-2
NR3C2	66.99	1.08	3.06 × 10	-2
NRBF2	458.32	-0.61	2.63 × 10	-2
NRD1	911.04	-0.59	4.54 × 10	-2
NSMAF	207.42	-0.51	6.15 × 10	-2
NT5C2	825.15	-0.69	1.32 × 10	-2
NUDCD3	160.13	0.51	1.37 × 10	-2
NUDT16	240.68	-0.71	7.54 × 10	-2
NUFIP2	1449.7	-0.87	2.28 × 10	-3
NUMB	1639.9	-0.61	6.48 × 10	-2
NUP133	97.73	0.67	3.83 × 10	-2
NUP205	112.94	0.57	1.35 × 10	-2
NUPL1	382.56	-0.57	2.45 × 10	-2
NUTF2	106.9	0.5	7.38 × 10	-2
OASL	104.31	0.58	1.00 × 10	-1
OAT	99.47	-0.73	1.92 × 10	-2
OBSCN	116.94	1.2	1.21 × 10	-2
ODF2	68.37	0.61	2.15 × 10	-2
OR2W3	184.67	0.64	9.11 × 10	-2
ORM1	86.65	-2.6	1.86 × 10	-5
ORMDL2	75.16	-0.63	1.07 × 10	-2
ORMDL3	168.52	0.66	9.11 × 10	-2
OSBP2	1078.8	0.96	4.37 × 10	-3
OSBPL8	1272.19	-0.62	1.08 × 10	-2
OSM	81.87	-2.07	1.19 × 10	-3
OSTF1	530.36	-0.77	3.00 × 10	-3
OTX1	53.37	-0.71	9.55 × 10	-2
OXER1	64.8	-0.7	3.40 × 10	-2
P2RY13	1339.94	-0.52	9.58 × 10	-2
P4HTM	63.28	0.68	5.74 × 10	-2
PAFAH1B1	547.43	-0.51	2.59 × 10	-2
PAFAH2	60.46	0.78	4.37 × 10	-2
PAGR1	123.21	-0.55	5.64 × 10	-2
PAPD4	325.95	-0.51	6.66 × 10	-2
PAQR8	65.2	0.78	7.59 × 10	-3
PATZ1	79.66	0.6	9.59 × 10	-2
PAX5	64.57	1.21	1.76 × 10	-2
PAXIP1	73.49	0.63	3.16 × 10	-3
PBX1	130.58	0.68	1.99 × 10	-2
PCDH9	66.03	0.81	7.88 × 10	-2
PCMT1	150.72	-0.73	6.57 × 10	-3
PCNXL2	136.17	0.59	2.44 × 10	-2
PCSK6	51.6	1.07	9.86 × 10	-3
PCYT1A	546.66	-0.72	1.91 × 10	-2
PDCD6IP	522.58	-0.55	1.07 × 10	-2
PDDC1	56.7	0.72	6.12 × 10	-2
PDE4DIP	206.47	0.68	7.90 × 10	-2
PDK2	55.83	0.8	1.39 × 10	-2
PDLIM1	74.44	0.57	5.49 × 10	-2
PDZK1IP1	244.2	0.7	3.22 × 10	-2
PEAK1	233.64	-0.66	2.47 × 10	-2
PEF1	90.33	-0.68	2.57 × 10	-2
PEX26	239.4	0.54	3.93 × 10	-3
PFKP	84.88	0.79	7.30 × 10	-2
PGAM1	524.15	-0.68	3.14 × 10	-3
PGK1	973.53	-0.95	1.04 × 10	-3
PGM2	226.92	-0.59	3.19 × 10	-3
PHC1	74.92	0.95	2.87 × 10	-2
PHF20L1	940.75	-0.88	1.36 × 10	-3
PHF21A	1258.53	-0.7	3.23 × 10	-2
PHIP	885.33	-0.69	4.44 × 10	-3
PHOSPHO1	2092	0.59	6.59 × 10	-2
PICALM	2776.95	-0.57	5.66 × 10	-2
PIGQ	82	0.67	8.32 × 10	-2
PIK3AP1	1345.64	-0.74	5.67 × 10	-2
PIK3C2B	64.51	0.97	6.84 × 10	-2
PIK3C3	378.55	-0.53	1.73 × 10	-2
PIK3CB	258.75	-0.64	5.04 × 10	-3
PIK3CG	785.43	-0.63	1.21 × 10	-2
PITPNM2	59.4	0.95	5.23 × 10	-4
PJA2	1096.47	-0.77	1.09 × 10	-2
PKD1	115.67	1.01	1.97 × 10	-2
PLD1	118.65	-0.91	1.17 × 10	-4
PLEC	1475.15	-0.6	4.95 × 10	-2
PLIN4	90.33	-1.28	8.68 × 10	-4
PLP2	736.4	-0.91	1.76 × 10	-4
PLVAP	108.12	1.04	4.27 × 10	-4
PLXDC2	1047.01	-0.56	6.76 × 10	-2
PLXND1	174.24	0.62	2.96 × 10	-2
PNPLA1	57.48	-1.16	1.32 × 10	-2
PNPLA8	133.91	-0.88	7.73 × 10	-3
POLE	96.69	0.64	7.17 × 10	-2
POLI	78.76	-0.59	8.72 × 10	-2
POMP	65.09	-0.58	5.87 × 10	-2
PPARGC1B	80.04	0.97	1.89 × 10	-2
PPDPF	321.42	0.55	6.74 × 10	-2
PPIG	139.22	-0.75	3.41 × 10	-3
PPIP5K2	337.61	-0.52	6.84 × 10	-2
PPM1B	301.69	-0.54	2.16 × 10	-2
PPM1L	87.22	0.56	5.67 × 10	-2
PPM1M	233.18	-0.53	6.99 × 10	-2
PPP1CB	705.44	-0.71	1.69 × 10	-2
PPP1R10	614.08	-0.59	9.01 × 10	-3
PPP1R12A	1300.32	-1.03	1.41 × 10	-5
PPP1R16B	128.02	0.63	6.22 × 10	-2
PPP2R2A	221.42	-0.67	2.18 × 10	-2
PPP2R3C	106.86	-0.59	7.41 × 10	-2
PPP2R5A	595.84	-0.81	1.13 × 10	-2
PPP6R3	514.48	-0.5	6.41 × 10	-2
PRAM1	378.38	-0.72	1.75 × 10	-2
PRDM10	122.21	-0.64	7.40 × 10	-2
PRDM5	97.39	-1.08	5.43 × 10	-3
PRDX2	369.61	0.65	3.77 × 10	-3
PRDX3	115.97	-0.51	1.92 × 10	-2
PRDX5	117.18	-0.5	4.34 × 10	-2
PRDX6	996.51	0.61	1.75 × 10	-2
PRF1	238.21	0.89	9.29 × 10	-3
PRKAR2A	209.44	-0.69	4.46 × 10	-2
PRMT7	52.07	0.77	7.80 × 10	-2
PROSER1	234.03	-0.62	9.90 × 10	-4
PRPF18	89.97	-0.55	2.99 × 10	-3
PRPF19	81.14	0.91	1.30 × 10	-2
PRPF38B	365.77	-0.79	5.27 × 10	-3
PRR13	725.5	-1.01	1.59 × 10	-5
PSMA2.1	64.98	-0.52	4.43 × 10	-2
PSMA6	104.63	-0.63	6.32 × 10	-2
PSMC6	107.41	-0.66	4.32 × 10	-2
PTGS1	228.95	0.59	7.55 × 10	-3
PTK2	61.31	0.75	8.13 × 10	-2
PTPN12	681.5	-0.69	6.07 × 10	-3
PTPRC	8115.08	-0.54	6.41 × 10	-2
RAB10	530.44	-0.57	4.92 × 10	-2
RAB18	218.35	-0.77	1.70 × 10	-3
RAB19	54.47	-2.24	1.41 × 10	-3
RAB1A	334.92	-0.79	1.15 × 10	-3
RAB21	411.83	-0.55	6.96 × 10	-2
RAB2A	294.87	-0.56	6.89 × 10	-4
RAB32	109.99	-0.91	1.10 × 10	-2
RAB3IL1	53.25	0.7	9.11 × 10	-2
RAB8B	525.95	-0.85	4.32 × 10	-3
RABAC1	100.31	-0.76	1.30 × 10	-2
RABL2B	72.2	0.85	1.99 × 10	-3
RAC2	1786.75	-0.54	1.48 × 10	-2
RANGAP1	87.17	0.55	6.90 × 10	-2
RAP1GAP	225.86	1	5.55 × 10	-3
RAP2C	231.3	-0.5	6.43 × 10	-2
RARRES3	63.16	0.65	8.54 × 10	-2
RASA4	125.67	0.84	1.27 × 10	-2
RASGRF2	67.67	0.81	8.52 × 10	-2
RASGRP4	898.1	-0.65	2.88 × 10	-2
RASSF2	3561.01	-0.51	5.99 × 10	-2
RB1	266.02	-0.61	4.02 × 10	-2
RBAK	75.89	-0.56	6.05 × 10	-2
RBM19	117.83	0.68	1.00 × 10	-3
RBM3	304.91	-0.86	1.38 × 10	-6
RBMXL1	167	-0.59	7.23 × 10	-2
RBP7	69.21	-0.89	1.86 × 10	-2
RCHY1	84.6	-0.89	2.21 × 10	-2
RDH11	83.42	0.63	1.21 × 10	-2
RFX5	107.7	0.62	6.64 × 10	-2
RGCC	111.59	0.91	8.05 × 10	-4
RGS18	577.74	-0.75	6.43 × 10	-2
RHOG	815.46	-0.66	3.78 × 10	-2
RHOT1	276.43	-0.57	7.33 × 10	-3
RILP	131.83	0.68	1.46 × 10	-2
RILPL1	53.43	-0.69	4.04 × 10	-2
RIPK3	130.69	-0.6	6.57 × 10	-2
RIT1	284.13	-0.66	1.18 × 10	-2
RLTPR	50.16	1.11	4.89 × 10	-2
RNASE2	103.59	-0.79	1.81 × 10	-2
RNF123	372.53	0.68	7.27 × 10	-3
RNF13	479.77	-0.54	7.38 × 10	-2
RNF14	214.01	0.57	1.12 × 10	-2
RNF141	355.01	-0.65	8.63 × 10	-3
RNF144A	109.57	0.57	3.43 × 10	-2
RNF24	2493.45	-0.65	4.43 × 10	-2
ROCK1	1183.78	-0.7	1.23 × 10	-2
RORA	377.79	0.88	1.81 × 10	-2
RP11-290H9.2	68.96	1.13	1.63 × 10	-2
RP11-437B10.1	115.69	-0.77	5.55 × 10	-4
RP11-574K11.31	77.14	-1.86	9.95 × 10	-3
RP2	328.48	-0.63	3.15 × 10	-2
RPA1	135.22	0.52	6.16 × 10	-2
RSPRY1	106.25	-0.64	8.89 × 10	-2
RTFDC1	475.03	-0.54	3.93 × 10	-2
RTN1	83.03	0.91	4.91 × 10	-4
RTN3	1563.54	-0.9	2.15 × 10	-3
RUFY3	100.52	0.58	3.44 × 10	-2
RUNDC3A	219.81	0.77	2.65 × 10	-2
S100A11	1415.63	-0.68	4.98 × 10	-2
S100A4	835.93	-0.56	1.55 × 10	-2
S1PR4	538.85	-0.75	2.65 × 10	-2
SAP30L	233.87	-0.58	3.32 × 10	-2
SARM1	84.39	0.83	2.01 × 10	-2
SAT1	1463.7	-0.55	5.25 × 10	-2
SBF2	708.67	-0.58	1.78 × 10	-2
SBK1	52.82	0.61	8.69 × 10	-2
SCN9A	53.41	-1.21	6.15 × 10	-3
SCRN1	64.9	0.64	5.63 × 10	-2
SEC16A	559.14	-0.56	7.08 × 10	-2
SEC22B	436.89	-0.75	2.17 × 10	-3
SEC23A	169.56	-0.59	3.41 × 10	-2
SEC24A	139.88	-0.6	8.83 × 10	-3
SEC31B	79.57	0.51	4.53 × 10	-2
SEC63	143.47	-0.52	7.17 × 10	-2
SELENBP1	1074.37	0.93	6.53 × 10	-4
SELL	7317.26	-0.8	1.48 × 10	-2
SELPLG	2343.14	-0.65	4.60 × 10	-2
SEMA3C	59.15	-0.53	3.05 × 10	-2
SEPHS2	187.94	-0.72	7.33 × 10	-3
40787	91.16	1.02	1.10 × 10	-2
SERINC1	843.69	-0.8	1.21 × 10	-2
SESN2	68.73	-0.94	1.67 × 10	-2
SETD1A	73.89	0.67	6.23 × 10	-2
SETD5	616.92	-0.55	3.48 × 10	-2
SF3B6	53.97	-0.58	8.42 × 10	-2
SFI1	171.85	0.56	4.60 × 10	-2
SH3BP5L	295.27	-0.64	8.74 × 10	-3
SH3PXD2A	55.23	0.91	1.71 × 10	-2
SH3YL1	76.99	0.59	9.59 × 10	-2
SIAH2	650.68	0.66	6.49 × 10	-3
SIDT1	88.66	0.56	6.35 × 10	-2
SIDT2	177.02	0.52	8.77 × 10	-2
SIGLEC14	693.41	-0.59	4.80 × 10	-2
SIK2	93.31	0.57	4.15 × 10	-2
SIRPA	1573.44	-0.5	6.00 × 10	-2
SIRPB1	1656.39	-0.59	1.73 × 10	-2
SKAP2	784.16	-0.91	1.70 × 10	-3
SLA2	110.18	0.63	1.57 × 10	-2
SLAMF7	156.3	0.79	9.08 × 10	-2
SLC12A6	2207.99	-0.54	5.91 × 10	-2
SLC12A7	117.54	1.08	1.10 × 10	-3
SLC12A9	888.16	-0.92	1.36 × 10	-2
SLC14A1	347.9	1.01	3.93 × 10	-4
SLC16A6	123.15	-0.64	3.81 × 10	-3
SLC1A3	60.91	-2.69	6.92 × 10	-4
SLC1A5	489.51	0.63	4.12 × 10	-2
SLC20A1	337.12	-0.6	9.62 × 10	-3
SLC22A23	69.9	1.3	5.61 × 10	-5
SLC22A4	187.41	-0.8	2.30 × 10	-2
SLC25A24	123.87	-0.61	1.57 × 10	-2
SLC25A38	102.37	0.67	5.89 × 10	-3
SLC25A39	7509.62	0.62	8.79 × 10	-2
SLC2A6	57.85	0.67	8.45 × 10	-2
SLC35E3	181.34	0.65	3.33 × 10	-2
SLC38A1	468.1	0.58	4.82 × 10	-2
SLC39A1	111.95	-1.06	3.82 × 10	-2
SLC48A1	187.94	0.79	3.81 × 10	-3
SLC4A1AP	96.02	-0.5	7.62 × 10	-3
SLC6A6	3138.47	-0.61	2.97 × 10	-2
SLC6A8	988.4	0.65	7.95 × 10	-2
SLC6A9	70.02	0.91	1.31 × 10	-2
SLFN5	619.11	0.68	5.90 × 10	-2
SLK	461.24	-0.6	7.18 × 10	-2
SLMAP	503.32	-0.61	3.49 × 10	-2
SMPD3	52.75	1.03	6.99 × 10	-2
SMYD2	67.4	0.61	5.31 × 10	-2
SMYD4	66.85	0.64	3.55 × 10	-2
SNAP23	605.89	-0.56	1.93 × 10	-2
SNCA	3790.61	0.62	5.55 × 10	-2
SNX13	524.61	-0.79	5.43 × 10	-4
SNX15	52.23	0.68	4.51 × 10	-2
SNX3	706	-0.63	5.52 × 10	-2
SNX6	261.94	-0.51	6.94 × 10	-2
SOS2	1175.39	-1.15	4.90 × 10	-5
SOX6	243.11	0.71	2.85 × 10	-2
SP100	1663.7	-0.68	2.26 × 10	-2
SP110	1260.92	-0.55	5.22 × 10	-2
SPECC1	1301.11	0.59	5.54 × 10	-2
SPECC1L	248.65	-0.58	6.74 × 10	-2
SPI1	1847.01	-0.66	3.13 × 10	-2
SPPL2A	231.15	-0.67	2.28 × 10	-2
SPPL2B	52.47	0.6	5.01 × 10	-2
SPRY3	63.7	-0.83	3.22 × 10	-2
SPTA1	64.58	0.74	6.94 × 10	-2
SPTAN1	537.1	0.7	2.66 × 10	-4
SPTB	677.89	0.84	5.66 × 10	-3
SPTLC1	193.23	-0.55	8.73 × 10	-3
SQRDL	372.5	-0.69	1.47 × 10	-2
SRC	68.55	0.89	1.75 × 10	-2
SRI	100.13	-0.6	4.26 × 10	-3
SRP54	158.04	-0.72	3.86 × 10	-3
SRP9	82.05	-0.6	2.08 × 10	-2
SRSF9	224.25	-0.53	5.27 × 10	-3
SSBP3	300.75	0.87	3.64 × 10	-3
SSBP4	77.65	0.51	8.60 × 10	-2
SSFA2	512.48	-0.61	2.05 × 10	-2
ST20-MTHFS	66.74	-1	2.44 × 10	-2
ST3GAL3	66.01	0.61	8.39 × 10	-2
ST6GALNAC3	72.59	-1.96	2.18 × 10	-3
ST6GALNAC4	220.65	0.67	3.94 × 10	-2
ST6GALNAC6	56.13	0.93	4.26 × 10	-3
STAG1	304.4	-0.59	2.55 × 10	-2
STARD9	67.69	1.09	1.63 × 10	-3
STAT3	1945.07	-0.6	8.81 × 10	-2
STAT5B	1744.86	-0.6	4.75 × 10	-2
STAU2	173.01	-0.56	4.56 × 10	-2
STEAP4	3215.61	-1.22	1.79 × 10	-4
STRADA	229.14	-0.71	9.65 × 10	-3
STRN	459.9	-0.6	5.74 × 10	-2
STX16	755.67	-0.6	2.73 × 10	-2
STX3	1263.64	-0.69	3.63 × 10	-2
STXBP3	356.09	-0.74	3.92 × 10	-3
STXBP5	703.99	-0.73	2.31 × 10	-2
SUB1	197.77	-0.65	3.51 × 10	-2
SUCLG1	95.44	-0.54	7.41 × 10	-2
SUMO1	78.16	-0.55	6.64 × 10	-2
SVIL	952.24	-0.6	3.82 × 10	-2
SYNJ2	72.23	0.67	8.96 × 10	-2
TAF7	339.44	-0.6	2.27 × 10	-2
TAMM41	54.32	0.6	4.38 × 10	-2
TANK	520.26	-0.62	5.57 × 10	-3
TAOK1	927.2	-0.62	1.55 × 10	-2
TAX1BP1	436.82	-0.57	1.79 × 10	-2
TBC1D17	126.75	0.51	1.28 × 10	-2
TBC1D23	132.79	-0.53	2.19 × 10	-2
TBC1D9	114.93	0.78	1.32 × 10	-2
TBCEL	182.07	0.64	1.35 × 10	-2
TBRG4	54.42	0.54	2.26 × 10	-2
TCAIM	80.59	-0.5	6.30 × 10	-2
TCF7L2	194.94	0.64	2.52 × 10	-3
TCOF1	87.67	0.62	7.54 × 10	-2
TDP1	54.52	0.84	1.75 × 10	-3
TDRD9	51.29	-1.34	1.99 × 10	-2
TERF1	87.83	-0.64	4.45 × 10	-2
TET2	3138.45	-0.61	6.06 × 10	-2
TFG	140.51	-0.63	4.91 × 10	-3
TGFBR1	485.94	-0.54	3.30 × 10	-4
TGIF1	52.17	0.68	2.01 × 10	-2
TGM2	110.37	0.98	1.80 × 10	-3
THAP11	61.05	0.66	9.39 × 10	-3
THAP5	110.79	-0.65	1.51 × 10	-2
THOC5	333.13	-0.61	3.19 × 10	-2
TIAM1	198.45	0.7	3.38 × 10	-2
TIMP2	870.45	-0.51	2.18 × 10	-2
TINF2	273.9	-0.58	3.30 × 10	-2
TIPRL	73.59	-0.6	1.50 × 10	-2
TJAP1	67.99	0.67	4.07 × 10	-3
TJP2	83.54	0.84	1.59 × 10	-2
TK2	158.18	-0.65	1.48 × 10	-2
TLK2	302.55	-0.57	7.62 × 10	-3
TLR1	1852.79	-0.89	3.76 × 10	-3
TLR6	1046.4	-0.71	4.44 × 10	-3
TM9SF2	697.43	-0.76	5.32 × 10	-2
TM9SF3	299.06	-0.51	6.52 × 10	-2
TMBIM4	300.16	-0.64	4.70 × 10	-2
TMCC2	289.68	0.89	1.52 × 10	-3
TMED3	67.02	0.62	4.20 × 10	-2
TMED5	288.18	-0.7	6.49 × 10	-3
TMEM158	52.06	0.92	6.20 × 10	-3
TMEM167A	215.9	-0.99	2.15 × 10	-4
TMEM167B	243.96	-0.82	4.18 × 10	-3
TMEM229B	76.79	0.71	7.68 × 10	-2
TMEM33	434.88	-0.51	4.08 × 10	-2
TMEM41B	76.1	-0.7	5.93 × 10	-2
TMTC2	93.74	-0.61	6.03 × 10	-2
TMX1	99.41	-0.75	3.93 × 10	-2
TMX4	780.56	-0.56	7.93 × 10	-2
TNFAIP6	88.41	-0.9	5.66 × 10	-2
TNFRSF9	75.05	1	3.14 × 10	-2
TNFSF10	1071.98	-0.56	4.21 × 10	-2
TNFSF13	197.32	-0.52	4.84 × 10	-2
TNIP2	110.54	-0.89	3.59 × 10	-3
TNS1	3220.44	0.8	2.27 × 10	-2
TOM1	247.84	-0.61	2.26 × 10	-2
TP53INP1	787.15	-0.56	6.38 × 10	-2
TPGS2	443.72	0.54	2.27 × 10	-2
TPK1	110.52	-0.87	3.73 × 10	-2
TPM3	2015.79	-0.66	1.78 × 10	-2
TRAF3	176.04	1.05	4.14 × 10	-4
TRAM2	70.31	0.59	3.56 × 10	-2
TRAPPC1	253.78	-0.53	2.78 × 10	-2
TRAPPC5	132.05	1.09	1.59 × 10	-2
TRAPPC6B	101.46	-0.61	1.67 × 10	-2
TREML1	83.94	0.64	5.72 × 10	-2
TRIB2	143.36	0.66	6.82 × 10	-2
TRIM10	90.5	0.61	6.50 × 10	-2
TRIM28	171.27	0.78	4.13 × 10	-3
TRIM35	78.64	0.5	2.43 × 10	-2
TRIO	171.15	0.75	1.62 × 10	-2
TRIP11	165.15	-0.5	6.29 × 10	-2
TRPM6	275.07	-0.86	4.60 × 10	-2
TSC22D1	280.92	0.74	6.80 × 10	-3
TSNAX	152.69	-1.21	2.06 × 10	-4
TSPAN14	1019.99	-0.55	5.47 × 10	-2
TSPAN18	73.8	1.16	1.70 × 10	-3
TTC21B	92.57	0.53	9.51 × 10	-2
TTC39C	124.51	0.64	9.72 × 10	-2
TTC7A	193.18	0.52	9.06 × 10	-3
TTC7B	62.84	0.66	4.92 × 10	-2
TTLL3	393.14	-0.58	1.41 × 10	-2
TWF1	67.69	-0.79	8.57 × 10	-2
TXN	108.84	-1.09	7.35 × 10	-4
TXNRD2	91.41	0.51	1.55 × 10	-2
TYROBP	1058.82	-0.68	2.21 × 10	-2
UBA3	157.87	-0.56	6.67 × 10	-3
UBA52	3010.31	0.57	5.79 × 10	-2
UBA6	230.27	-0.87	3.23 × 10	-3
UBAP1L	52.24	0.7	5.50 × 10	-2
UBASH3A	74.18	0.95	7.72 × 10	-2
UBB	7556.25	0.55	8.20 × 10	-2
UBE2D1	332.37	-0.82	5.69 × 10	-2
UBE2J1	539.6	-0.83	2.05 × 10	-3
UBE2O	572.49	1.03	2.58 × 10	-4
UBFD1	102.13	0.71	5.79 × 10	-3
UBL4A	59.28	0.61	6.15 × 10	-2
UBL7	143.97	0.57	5.23 × 10	-2
UBLCP1	105.45	-0.75	1.69 × 10	-2
UBR3	344.65	-0.63	4.53 × 10	-4
UCHL5	60.74	-0.73	8.02 × 10	-2
UHRF1BP1	76.09	0.52	4.34 × 10	-2
ULK3	53.05	0.67	9.76 × 10	-3
USP15	2206.12	-0.84	1.36 × 10	-2
USP3	782.43	-0.58	3.63 × 10	-2
USP31	59.08	0.85	2.74 × 10	-2
USP38	208.47	-0.59	1.75 × 10	-2
USP47	233.77	-0.66	7.37 × 10	-5
USP9X	1343.12	-0.67	1.45 × 10	-2
UTY	322.58	-0.56	8.78 × 10	-2
UXS1	100.78	0.55	5.72 × 10	-2
VAMP3	326.65	-0.71	4.10 × 10	-3
VARS	56.53	0.82	8.83 × 10	-3
VASH1	60.16	0.74	8.43 × 10	-2
VASP	1621.22	-0.61	6.30 × 10	-2
VAV3	305.82	-0.9	3.63 × 10	-5
VCAN	7722.89	-0.95	6.49 × 10	-3
VCPKMT	97.97	-1.01	3.41 × 10	-6
VNN3	576.75	-0.76	1.83 × 10	-2
VPS29	124.43	-0.64	1.79 × 10	-2
VPS36	160.1	-0.63	7.63 × 10	-2
VPS54	117.33	-0.58	7.26 × 10	-2
VTA1	109.9	-0.6	9.85 × 10	-3
VWCE	70.77	0.67	3.41 × 10	-2
WDR45	453.45	0.56	6.30 × 10	-3
WDR59	122.26	0.68	5.13 × 10	-4
WTAP	428.18	-0.57	8.87 × 10	-3
XPO4	119.09	0.85	1.27 × 10	-2
XPO6	3874.63	-0.75	3.70 × 10	-2
XPO7	644.59	0.54	9.71 × 10	-2
XRN1	875.64	-0.52	5.58 × 10	-2
XRRA1	69.95	0.89	1.73 × 10	-2
YTHDF3	476.17	-0.65	9.90 × 10	-4
ZBTB25	151.34	0.68	4.10 × 10	-2
ZBTB37	755.6	-0.57	1.65 × 10	-2
ZBTB39	52.48	0.59	1.78 × 10	-2
ZC3H12D	80	1.05	1.74 × 10	-2
ZCCHC6	1536.2	-0.57	3.69 × 10	-2
ZDHHC17	319.96	-0.73	2.11 × 10	-3
ZDHHC20	580.21	-0.97	6.68 × 10	-3
ZFC3H1	665.37	-0.69	1.40 × 10	-2
ZFP36	2265.88	-0.79	6.04 × 10	-2
ZMYM2	531.59	-0.89	4.23 × 10	-3
ZMYM5	89.22	-0.75	1.78 × 10	-2
ZNF101	229.91	-0.52	2.70 × 10	-2
ZNF106	1298.29	-0.5	2.21 × 10	-2
ZNF107	209.77	-0.96	3.22 × 10	-3
ZNF182	54.48	-0.55	9.95 × 10	-2
ZNF189	77.97	-0.76	5.38 × 10	-4
ZNF267	258.31	-0.51	2.71 × 10	-2
ZNF282	80.72	-0.75	9.07 × 10	-2
ZNF354A	67.51	-0.92	3.48 × 10	-2
ZNF385A	219.8	0.5	7.90 × 10	-2
ZNF407	360.96	-0.57	8.54 × 10	-4
ZNF486	83.99	-0.64	6.14 × 10	-2
ZNF552	76.52	-0.51	6.97 × 10	-2
ZNF564	62.53	-0.7	8.22 × 10	-3
ZNF700	119.38	-0.89	8.13 × 10	-4
ZNF708	110.17	-0.69	1.64 × 10	-2
ZNF776	211.22	-0.6	2.83 × 10	-2
ZNF780A	149.75	-0.69	2.70 × 10	-2
ZNF827	70.87	0.87	9.53 × 10	-2
ZNF831	191.93	0.81	1.08 × 10	-2
ZNF852	92.51	-0.91	3.38 × 10	-2
ZSWIM6	391.14	-0.62	6.41 × 10	-3
Filter criteria: baseMean ≥ 50, |log2FC| ≥ 0.5, padj ≤ 0.1 and anesthetic-specific; baseMean, mean mRNA expression; log2FC, log2 fold change: Negative fold changes indicate upregulation of the corresponding mRNA after termination of surgery, positive fold changes show downregulation of the corresponding mRNA; padj, adjusted P-value; mRNAs specific for the anesthetic are depicted in italics.
